# Supplementary material for: Tree diversity of the Dja Faunal Reserve, southeastern Cameroon
Source: Biodivers Data J. 2014 Jan 24;(2):e1049. doi: 10.3897/BDJ.2.e1049 (PMC4030213; doi:10.3897/BDJ.2.e1049)
Supplement: Supplementary material 1 — List of all individuals collected in all 9 transects of the Dja Faunal Resreve. [file biodiversity_data_journal-2-e1049-s001.xls]

## Sheet: Feuil1
Transect_number	species_name	family_name	diameter (cm)
T1	Dracaena arborea	Agavaceae	68.4
T1	Dracaena arborea	Agavaceae	120.3
T2	Dracaena arborea	Agavaceae	42
T3	Dracaena arborea	Agavaceae	88.2
T6	Dracaena arborea	Agavaceae	82.4
T1	Trichoscypha acuminata	Anacardiaceae	14.6
T1	Pseudospondias microcarpa	Anacardiaceae	12.4
T1	Sorindeia grandifolia	Anacardiaceae	25.8
T1	Sorindeia grandifolia	Anacardiaceae	28.6
T1	Sorindeia sp.	Anacardiaceae	10.5
T1	Pseudospondias microcarpa	Anacardiaceae	25.5
T1	Trichoscypha acuminata	Anacardiaceae	19.4
T1	Sorindeia grandifolia	Anacardiaceae	35.7
T1	Trichoscypha acuminata	Anacardiaceae	10.5
T1	Sorindeia sp.	Anacardiaceae	11.5
T1	Trichoscypha acuminata	Anacardiaceae	11.5
T1	Trichoscypha acuminata	Anacardiaceae	16.2
T1	Sorindeia grandifolia	Anacardiaceae	17.8
T1	Pseudospondias microcarpa	Anacardiaceae	10.2
T1	Trichoscypha acuminata	Anacardiaceae	24.8
T1	Sorindeia grandifolia	Anacardiaceae	19.4
T1	Trichoscypha acuminata	Anacardiaceae	17.2
T1	Sorindeia grandifolia	Anacardiaceae	15.9
T1	Pseudospondias microcarpa	Anacardiaceae	19.7
T1	Sorindeia grandifolia	Anacardiaceae	10.5
T1	Trichoscypha acuminata	Anacardiaceae	18.8
T1	Sorindeia sp.	Anacardiaceae	10.8
T1	Sorindeia grandifolia	Anacardiaceae	16.9
T1	Trichoscypha acuminata	Anacardiaceae	14
T1	Pseudospondias microcarpa	Anacardiaceae	17.8
T1	Sorindeia grandifolia	Anacardiaceae	12.1
T1	Sorindeia sp.	Anacardiaceae	10.5
T1	Trichoscypha acuminata	Anacardiaceae	10.2
T1	Trichoscypha acuminata	Anacardiaceae	11.5
T1	Sorindeia grandifolia	Anacardiaceae	13.4
T1	Trichoscypha acuminata	Anacardiaceae	22.6
T1	Sorindeia grandifolia	Anacardiaceae	18.8
T1	Pseudospondias microcarpa	Anacardiaceae	20.1
T1	Pseudospondias microcarpa	Anacardiaceae	30.9
T1	Sorindeia grandifolia	Anacardiaceae	10.8
T1	Trichoscypha acuminata	Anacardiaceae	27.1
T1	Pseudospondias microcarpa	Anacardiaceae	13.5
T1	Trichoscypha arborea	Anacardiaceae	18.8
T1	Pseudospondias microcarpa	Anacardiaceae	15.9
T1	Sorindeia grandifolia	Anacardiaceae	14.3
T1	Pseudospondias microcarpa	Anacardiaceae	65.6
T1	Pseudospondias microcarpa	Anacardiaceae	15.3
T1	Trichoscypha acuminata	Anacardiaceae	20.4
T1	Pseudospondias microcarpa	Anacardiaceae	16.6
T1	Pseudospondias microcarpa	Anacardiaceae	16.9
T1	Sorindeia sp.	Anacardiaceae	12.4
T1	Sorindeia grandifolia	Anacardiaceae	17.2
T1	Antrocaryon klaineanum	Anacardiaceae	14.3
T1	Sorindeia grandifolia	Anacardiaceae	13.1
T1	Sorindeia grandifolia	Anacardiaceae	11.5
T1	Trichoscypha acuminata	Anacardiaceae	10.5
T1	Sorindeia grandifolia	Anacardiaceae	16.2
T1	Sorindeia grandifolia	Anacardiaceae	11.8
T1	Trichoscypha acuminata	Anacardiaceae	13.4
T1	Trichoscypha acuminata	Anacardiaceae	14
T1	Pseudospondias microcarpa	Anacardiaceae	15.3
T1	Trichoscypha acuminata	Anacardiaceae	10.8
T1	Sorindeia sp.	Anacardiaceae	10.8
T1	Trichoscypha acuminata	Anacardiaceae	22.9
T1	Trichoscypha acuminata	Anacardiaceae	18.5
T1	Sorindeia grandifolia	Anacardiaceae	11.8
T2	Sorindeia sp.	Anacardiaceae	13.1
T2	Trichoscypha acuminata	Anacardiaceae	10.5
T2	Sorindeia grandifolia	Anacardiaceae	17.3
T2	Trichoscypha acuminata	Anacardiaceae	10.8
T2	Pseudospondias microcarpa	Anacardiaceae	17.5
T2	Pseudospondias microcarpa	Anacardiaceae	14.6
T2	Trichoscypha acuminata	Anacardiaceae	14
T2	Sorindeia grandifolia	Anacardiaceae	12.7
T2	Trichoscypha arborea	Anacardiaceae	14.3
T2	Sorindeia grandifolia	Anacardiaceae	15
T2	Sorindeia grandifolia	Anacardiaceae	19.7
T2	Sorindeia grandifolia	Anacardiaceae	11.5
T2	Sorindeia grandifolia	Anacardiaceae	21
T2	Sorindeia grandifolia	Anacardiaceae	11.5
T2	Trichoscypha acuminata	Anacardiaceae	11.8
T2	Sorindeia grandifolia	Anacardiaceae	10.2
T2	Sorindeia grandifolia	Anacardiaceae	15.3
T2	Sorindeia grandifolia	Anacardiaceae	14.8
T2	Trichoscypha acuminata	Anacardiaceae	13.1
T2	Trichoscypha acuminata	Anacardiaceae	14
T2	Sorindeia sp.	Anacardiaceae	12.1
T2	Sorindeia grandifolia	Anacardiaceae	28.3
T2	Sorindeia grandifolia	Anacardiaceae	10.2
T2	Trichoscypha acuminata	Anacardiaceae	11.1
T2	Trichoscypha acuminata	Anacardiaceae	11.8
T2	Trichoscypha acuminata	Anacardiaceae	29.6
T2	Sorindeia grandifolia	Anacardiaceae	13.8
T2	Sorindeia grandifolia	Anacardiaceae	18.5
T2	Trichoscypha acuminata	Anacardiaceae	22.3
T2	Sorindeia sp.	Anacardiaceae	24.6
T2	Sorindeia grandifolia	Anacardiaceae	14.9
T2	Sorindeia grandifolia	Anacardiaceae	17.2
T2	Trichoscypha acuminata	Anacardiaceae	17.2
T2	Sorindeia grandifolia	Anacardiaceae	14
T2	Trichoscypha acuminata	Anacardiaceae	24.8
T2	Trichoscypha acuminata	Anacardiaceae	13.4
T2	Lannea welwitschii	Anacardiaceae	17.2
T2	Pseudospondias microcarpa	Anacardiaceae	16.4
T2	Sorindeia grandifolia	Anacardiaceae	12
T2	Sorindeia grandifolia	Anacardiaceae	24
T2	Trichoscypha acuminata	Anacardiaceae	19.4
T2	Trichoscypha acuminata	Anacardiaceae	19.4
T2	Trichoscypha acuminata	Anacardiaceae	12.7
T2	Trichoscypha acuminata	Anacardiaceae	17.9
T2	Trichoscypha acuminata	Anacardiaceae	18.8
T2	Sorindeia grandifolia	Anacardiaceae	13.1
T2	Trichoscypha acuminata	Anacardiaceae	33.7
T2	Sorindeia grandifolia	Anacardiaceae	14.5
T2	Sorindeia grandifolia	Anacardiaceae	11.1
T2	Trichoscypha acuminata	Anacardiaceae	15.7
T2	Sorindeia grandifolia	Anacardiaceae	19.5
T2	Sorindeia grandifolia	Anacardiaceae	16
T2	Sorindeia grandifolia	Anacardiaceae	11.3
T2	Sorindeia grandifolia	Anacardiaceae	19.2
T2	Trichoscypha acuminata	Anacardiaceae	15
T2	Sorindeia grandifolia	Anacardiaceae	12.4
T2	Trichoscypha acuminata	Anacardiaceae	18.6
T2	Sorindeia grandifolia	Anacardiaceae	11.1
T2	Sorindeia grandifolia	Anacardiaceae	13.2
T2	Sorindeia sp.	Anacardiaceae	11.6
T3	Sorindeia sp.	Anacardiaceae	10.2
T3	Sorindeia grandifolia	Anacardiaceae	10.5
T3	Sorindeia grandifolia	Anacardiaceae	12.4
T3	Sorindeia grandifolia	Anacardiaceae	11.5
T3	Sorindeia grandifolia	Anacardiaceae	19.7
T3	Trichoscypha acuminata	Anacardiaceae	10.4
T3	Sorindeia grandifolia	Anacardiaceae	18.1
T3	Sorindeia grandifolia	Anacardiaceae	15.9
T3	Trichoscypha acuminata	Anacardiaceae	20.1
T3	Trichoscypha acuminata	Anacardiaceae	27.1
T3	Trichoscypha acuminata	Anacardiaceae	10.2
T3	Sorindeia sp.	Anacardiaceae	13.4
T3	Pseudospondias microcarpa	Anacardiaceae	27.2
T3	Pseudospondias microcarpa	Anacardiaceae	10.6
T3	Pseudospondias microcarpa	Anacardiaceae	17.8
T3	Sorindeia grandifolia	Anacardiaceae	12.7
T3	Sorindeia grandifolia	Anacardiaceae	15.4
T3	Sorindeia sp.	Anacardiaceae	12.1
T3	Trichoscypha acuminata	Anacardiaceae	24.8
T3	Trichoscypha acuminata	Anacardiaceae	14.6
T3	Pseudospondias microcarpa	Anacardiaceae	30.6
T3	Sorindeia sp.	Anacardiaceae	10.2
T3	Sorindeia grandifolia	Anacardiaceae	21
T3	Pseudospondias microcarpa	Anacardiaceae	15.1
T3	Sorindeia grandifolia	Anacardiaceae	13.2
T3	Trichoscypha acuminata	Anacardiaceae	10.9
T3	Pseudospondias microcarpa	Anacardiaceae	20.7
T3	Sorindeia grandifolia	Anacardiaceae	14.3
T3	Trichoscypha acuminata	Anacardiaceae	18.8
T3	Trichoscypha acuminata	Anacardiaceae	14.6
T3	Sorindeia grandifolia	Anacardiaceae	15.9
T3	Trichoscypha acuminata	Anacardiaceae	11.6
T3	Trichoscypha acuminata	Anacardiaceae	31.5
T3	Trichoscypha acuminata	Anacardiaceae	13.1
T3	Sorindeia grandifolia	Anacardiaceae	16.4
T3	Trichoscypha acuminata	Anacardiaceae	11.8
T3	Sorindeia sp.	Anacardiaceae	12.4
T3	Sorindeia sp.	Anacardiaceae	16.6
T3	Sorindeia grandifolia	Anacardiaceae	15.6
T3	Sorindeia grandifolia	Anacardiaceae	14.6
T3	Trichoscypha acuminata	Anacardiaceae	15.6
T3	Sorindeia grandifolia	Anacardiaceae	26.9
T3	Trichoscypha acuminata	Anacardiaceae	18.8
T4	Sorindeia grandifolia	Anacardiaceae	11.5
T4	Trichoscypha acuminata	Anacardiaceae	15.8
T4	Trichoscypha acuminata	Anacardiaceae	20.1
T4	Sorindeia sp.	Anacardiaceae	13.4
T4	Trichoscypha arborea	Anacardiaceae	90.7
T4	Trichoscypha acuminata	Anacardiaceae	18.8
T4	Trichoscypha arborea	Anacardiaceae	76.1
T4	Pseudospondias microcarpa	Anacardiaceae	29.6
T4	Trichoscypha acuminata	Anacardiaceae	25.2
T4	Sorindeia sp.	Anacardiaceae	11.1
T4	Sorindeia grandifolia	Anacardiaceae	11.1
T4	Trichoscypha acuminata	Anacardiaceae	20.1
T4	Sorindeia grandifolia	Anacardiaceae	20.2
T4	Trichoscypha acuminata	Anacardiaceae	14.3
T4	Sorindeia grandifolia	Anacardiaceae	11.3
T4	Trichoscypha acuminata	Anacardiaceae	12.6
T4	Pseudospondias microcarpa	Anacardiaceae	14
T4	Trichoscypha acuminata	Anacardiaceae	19.6
T4	Trichoscypha acuminata	Anacardiaceae	12.4
T4	Antrocaryon klaineanum	Anacardiaceae	26.9
T4	Sorindeia grandifolia	Anacardiaceae	22.3
T4	Trichoscypha acuminata	Anacardiaceae	10.6
T4	Sorindeia grandifolia	Anacardiaceae	11.5
T4	Trichoscypha acuminata	Anacardiaceae	19.6
T4	Trichoscypha acuminata	Anacardiaceae	13.4
T4	Trichoscypha acuminata	Anacardiaceae	19.4
T4	Trichoscypha acuminata	Anacardiaceae	11.8
T4	Sorindeia grandifolia	Anacardiaceae	10.3
T4	Trichoscypha acuminata	Anacardiaceae	22.3
T4	Sorindeia grandifolia	Anacardiaceae	21.3
T4	Trichoscypha acuminata	Anacardiaceae	20.7
T4	Sorindeia grandifolia	Anacardiaceae	13.4
T4	Sorindeia sp.	Anacardiaceae	11.9
T4	Sorindeia grandifolia	Anacardiaceae	11.8
T4	Pseudospondias microcarpa	Anacardiaceae	19.8
T4	Sorindeia grandifolia	Anacardiaceae	23.3
T4	Sorindeia grandifolia	Anacardiaceae	11
T4	Sorindeia grandifolia	Anacardiaceae	21.6
T4	Trichoscypha acuminata	Anacardiaceae	12.4
T4	Lannea welwitschii	Anacardiaceae	30.3
T4	Trichoscypha arborea	Anacardiaceae	50.3
T4	Sorindeia sp.	Anacardiaceae	10.7
T5	Lannea welwitschii	Anacardiaceae	15.9
T5	Trichoscypha acuminata	Anacardiaceae	52.5
T5	Sorindeia sp.	Anacardiaceae	13.6
T5	Sorindeia sp.	Anacardiaceae	12.8
T5	Lannea welwitschii	Anacardiaceae	27.6
T5	Trichoscypha acuminata	Anacardiaceae	15.3
T5	Trichoscypha acuminata	Anacardiaceae	7.2
T5	Trichoscypha acuminata	Anacardiaceae	16.6
T5	Trichoscypha acuminata	Anacardiaceae	13.5
T5	Sorindeia grandifolia	Anacardiaceae	11.8
T5	Trichoscypha acuminata	Anacardiaceae	20.1
T5	Sorindeia grandifolia	Anacardiaceae	11.7
T5	Trichoscypha acuminata	Anacardiaceae	13.5
T5	Sorindeia sp.	Anacardiaceae	17.9
T5	Trichoscypha acuminata	Anacardiaceae	17.5
T5	Pseudospondias microcarpa	Anacardiaceae	11.8
T5	Trichoscypha acuminata	Anacardiaceae	11
T5	Sorindeia grandifolia	Anacardiaceae	13.2
T5	Trichoscypha acuminata	Anacardiaceae	13.5
T5	Trichoscypha acuminata	Anacardiaceae	15.3
T5	Sorindeia grandifolia	Anacardiaceae	14.8
T5	Sorindeia grandifolia	Anacardiaceae	15.8
T5	Sorindeia sp.	Anacardiaceae	14.1
T5	Pseudospondias microcarpa	Anacardiaceae	22.8
T5	Trichoscypha acuminata	Anacardiaceae	25.3
T5	Trichoscypha acuminata	Anacardiaceae	21.6
T6	Pseudospondias microcarpa	Anacardiaceae	16.6
T6	Sorindeia grandifolia	Anacardiaceae	18
T6	Trichoscypha acuminata	Anacardiaceae	25.9
T6	Trichoscypha acuminata	Anacardiaceae	33.7
T6	Trichoscypha acuminata	Anacardiaceae	14.8
T6	Trichoscypha acuminata	Anacardiaceae	19.5
T6	Trichoscypha acuminata	Anacardiaceae	11.6
T6	Sorindeia sp.	Anacardiaceae	10.5
T6	Pseudospondias microcarpa	Anacardiaceae	16.6
T6	Sorindeia sp.	Anacardiaceae	15.8
T6	Lannea welwitschii	Anacardiaceae	20.9
T6	Trichoscypha acuminata	Anacardiaceae	10.7
T6	Trichoscypha acuminata	Anacardiaceae	20.1
T6	Pseudospondias microcarpa	Anacardiaceae	20.3
T6	Trichoscypha acuminata	Anacardiaceae	17.5
T6	Sorindeia grandifolia	Anacardiaceae	10.5
T6	Sorindeia grandifolia	Anacardiaceae	10.6
T6	Pseudospondias microcarpa	Anacardiaceae	17.4
T6	Trichoscypha acuminata	Anacardiaceae	16.2
T6	Pseudospondias microcarpa	Anacardiaceae	30.2
T6	Sorindeia sp.	Anacardiaceae	14.5
T6	Pseudospondias microcarpa	Anacardiaceae	12
T6	Trichoscypha acuminata	Anacardiaceae	14.5
T6	Sorindeia sp.	Anacardiaceae	13.8
T6	Trichoscypha acuminata	Anacardiaceae	13.7
T6	Trichoscypha acuminata	Anacardiaceae	11
T6	Sorindeia grandifolia	Anacardiaceae	10.7
T6	Trichoscypha acuminata	Anacardiaceae	17.3
T6	Trichoscypha acuminata	Anacardiaceae	12.9
T6	Sorindeia sp.	Anacardiaceae	20.5
T6	Sorindeia sp.	Anacardiaceae	14.3
T6	Trichoscypha acuminata	Anacardiaceae	14.2
T7	Lannea welwitschii	Anacardiaceae	19.7
T7	Trichoscypha acuminata	Anacardiaceae	10.7
T7	Lannea welwitschii	Anacardiaceae	15.3
T7	Sorindeia sp.	Anacardiaceae	25.5
T7	Trichoscypha acuminata	Anacardiaceae	11.7
T7	Trichoscypha arborea	Anacardiaceae	19.4
T7	Lannea welwitschii	Anacardiaceae	25
T7	Trichoscypha acuminata	Anacardiaceae	30.2
T7	Trichoscypha acuminata	Anacardiaceae	11.1
T7	Pseudospondias microcarpa	Anacardiaceae	22.2
T7	Sorindeia grandifolia	Anacardiaceae	16.6
T7	Sorindeia grandifolia	Anacardiaceae	18.1
T7	Trichoscypha acuminata	Anacardiaceae	27.7
T7	Trichoscypha arborea	Anacardiaceae	18.6
T7	Trichoscypha arborea	Anacardiaceae	11.9
T7	Trichoscypha arborea	Anacardiaceae	16.4
T7	Pseudospondias microcarpa	Anacardiaceae	15.4
T7	Trichoscypha arborea	Anacardiaceae	15.8
T7	Trichoscypha arborea	Anacardiaceae	9.5
T7	Trichoscypha acuminata	Anacardiaceae	35.8
T7	Sorindeia grandifolia	Anacardiaceae	14.3
T7	Trichoscypha acuminata	Anacardiaceae	26.4
T7	Trichoscypha acuminata	Anacardiaceae	12.7
T7	Trichoscypha acuminata	Anacardiaceae	12.5
T7	Pseudospondias microcarpa	Anacardiaceae	32.8
T7	Sorindeia grandifolia	Anacardiaceae	11.9
T7	Trichoscypha acuminata	Anacardiaceae	23.2
T7	Trichoscypha acuminata	Anacardiaceae	10.6
T7	Lannea welwitschii	Anacardiaceae	79.6
T7	Sorindeia grandifolia	Anacardiaceae	17
T7	Sorindeia grandifolia	Anacardiaceae	11.1
T7	Sorindeia grandifolia	Anacardiaceae	17.7
T8	Lannea welwitschii	Anacardiaceae	78.9
T8	Lannea welwitschii	Anacardiaceae	22.6
T8	Sorindeia sp.	Anacardiaceae	23.9
T8	Sorindeia sp.	Anacardiaceae	10.5
T8	Sorindeia sp.	Anacardiaceae	21.6
T8	Sorindeia sp.	Anacardiaceae	14
T8	Sorindeia sp.	Anacardiaceae	12.7
T8	Sorindeia sp.	Anacardiaceae	18.5
T8	Sorindeia sp.	Anacardiaceae	10.5
T8	Trichoscypha acuminata	Anacardiaceae	11.1
T8	Trichoscypha acuminata	Anacardiaceae	10.2
T8	Trichoscypha acuminata	Anacardiaceae	10.2
T8	Sorindeia sp.	Anacardiaceae	16.2
T8	Trichoscypha acuminata	Anacardiaceae	10.5
T8	Trichoscypha arborea	Anacardiaceae	70
T8	Sorindeia sp.	Anacardiaceae	22
T8	Trichoscypha acuminata	Anacardiaceae	12.7
T8	Trichoscypha acuminata	Anacardiaceae	15.6
T8	Sorindeia sp.	Anacardiaceae	13.7
T8	Trichoscypha acuminata	Anacardiaceae	10.5
T8	Sorindeia sp.	Anacardiaceae	12.7
T8	Trichoscypha acuminata	Anacardiaceae	12.4
T9	Trichoscypha acuminata	Anacardiaceae	20.1
T9	Sorindeia grandifolia	Anacardiaceae	11.5
T9	Sorindeia grandifolia	Anacardiaceae	20.5
T9	Antrocaryon klaineanum	Anacardiaceae	20.4
T9	Lannea welwitschii	Anacardiaceae	35.2
T9	Lannea welwitschii	Anacardiaceae	20.6
T9	Trichoscypha acuminata	Anacardiaceae	32.4
T9	Lannea welwitschii	Anacardiaceae	51.6
T9	Sorindeia sp.	Anacardiaceae	48.7
T9	Sorindeia sp.	Anacardiaceae	10.5
T9	Pseudospondias microcarpa	Anacardiaceae	10.3
T9	Trichoscypha acuminata	Anacardiaceae	13.1
T9	Sorindeia grandifolia	Anacardiaceae	10.8
T9	Trichoscypha acuminata	Anacardiaceae	14.6
T9	Trichoscypha acuminata	Anacardiaceae	25.1
T9	Sorindeia sp.	Anacardiaceae	10.2
T9	Sorindeia sp.	Anacardiaceae	12.9
T9	Trichoscypha acuminata	Anacardiaceae	10.3
T9	Antrocaryon micraster	Anacardiaceae	90.7
T9	Trichoscypha acuminata	Anacardiaceae	16.1
T9	Pseudospondias microcarpa	Anacardiaceae	14.3
T1	Anopyxis klaineana	Anisophylleaceae	11.8
T4	Anopyxis klaineana	Anisophylleaceae	13.5
T4	Anopyxis klaineana	Anisophylleaceae	60.2
T5	Anopyxis klaineana	Anisophylleaceae	18.3
T5	Anopyxis klaineana	Anisophylleaceae	90.7
T6	Anopyxis klaineana	Anisophylleaceae	12.2
T6	Anopyxis klaineana	Anisophylleaceae	23.6
T8	Anopyxis klaineana	Anisophylleaceae	12.7
T8	Anopyxis klaineana	Anisophylleaceae	15.9
T8	Anopyxis klaineana	Anisophylleaceae	12.4
T1	Greenwayodendron suaveolens	Annonaceae	35
T1	Anonidium mannii	Annonaceae	21.6
T1	Xylopia sp.	Annonaceae	22.3
T1	Greenwayodendron suaveolens	Annonaceae	19.1
T1	Annickia affinis	Annonaceae	15.9
T1	Xylopia quintasii	Annonaceae	14
T1	Xylopia quintasii	Annonaceae	11.1
T1	Anonidium mannii	Annonaceae	13.1
T1	Anonidium mannii	Annonaceae	19.1
T1	Annickia affinis	Annonaceae	14.6
T1	Anonidium mannii	Annonaceae	12.1
T1	Anonidium mannii	Annonaceae	15
T1	Anonidium mannii	Annonaceae	10.5
T1	Anonidium mannii	Annonaceae	13.1
T1	Greenwayodendron suaveolens	Annonaceae	10.5
T1	Cleistopholis patens	Annonaceae	49
T1	Greenwayodendron suaveolens	Annonaceae	33.1
T1	Greenwayodendron suaveolens	Annonaceae	15.6
T1	Anonidium mannii	Annonaceae	10.8
T1	Anonidium mannii	Annonaceae	15.3
T1	Anonidium mannii	Annonaceae	18.8
T1	Hexalobus crispiflorus	Annonaceae	15
T1	Anonidium mannii	Annonaceae	21.6
T1	Annickia affinis	Annonaceae	38.5
T1	Annickia affinis	Annonaceae	10.2
T1	Anonidium mannii	Annonaceae	22
T1	Cleistopholis patens	Annonaceae	11.5
T1	Uvariopsis dioica	Annonaceae	10.5
T1	Monodora tenuifolia	Annonaceae	11.1
T1	Anonidium mannii	Annonaceae	35.3
T1	Anonidium mannii	Annonaceae	26.4
T1	Greenwayodendron suaveolens	Annonaceae	11.8
T1	Anonidium mannii	Annonaceae	10.2
T1	Duguetia staudtii	Annonaceae	12.4
T1	Anonidium mannii	Annonaceae	15
T1	Anonidium mannii	Annonaceae	37.2
T1	Greenwayodendron suaveolens	Annonaceae	37.9
T1	Anonidium mannii	Annonaceae	15.6
T1	Duguetia staudtii	Annonaceae	20.1
T1	Greenwayodendron suaveolens	Annonaceae	28
T1	Anonidium mannii	Annonaceae	15
T1	Anonidium mannii	Annonaceae	22
T1	Greenwayodendron suaveolens	Annonaceae	14.3
T1	Anonidium mannii	Annonaceae	57.9
T1	Greenwayodendron suaveolens	Annonaceae	14
T1	Xylopia aethiopica	Annonaceae	26.4
T1	Greenwayodendron suaveolens	Annonaceae	21.6
T1	Anonidium mannii	Annonaceae	18.1
T1	Anonidium mannii	Annonaceae	43
T1	Anonidium mannii	Annonaceae	18.8
T1	Xylopia aethiopica	Annonaceae	11.1
T1	Anonidium mannii	Annonaceae	18.8
T1	Greenwayodendron suaveolens	Annonaceae	11.5
T1	Cleistopholis patens	Annonaceae	16.6
T1	Annickia affinis	Annonaceae	13.7
T1	Anonidium mannii	Annonaceae	30.6
T1	Anonidium mannii	Annonaceae	23.9
T1	Greenwayodendron suaveolens	Annonaceae	17.2
T1	Anonidium mannii	Annonaceae	10.5
T1	Greenwayodendron suaveolens	Annonaceae	36.9
T1	Anonidium mannii	Annonaceae	12.1
T1	Cleistopholis patens	Annonaceae	10.2
T1	Greenwayodendron suaveolens	Annonaceae	10.5
T1	Anonidium mannii	Annonaceae	11.8
T1	Anonidium mannii	Annonaceae	11.1
T1	Greenwayodendron suaveolens	Annonaceae	22.9
T1	Anonidium mannii	Annonaceae	16.2
T1	Anonidium mannii	Annonaceae	19.1
T1	Xylopia rubescens	Annonaceae	11.1
T1	Anonidium mannii	Annonaceae	14.6
T1	Annickia affinis	Annonaceae	25.1
T1	Hexalobus crispiflorus	Annonaceae	15
T1	Anonidium mannii	Annonaceae	14
T1	Anonidium mannii	Annonaceae	12.1
T1	Anonidium mannii	Annonaceae	12.7
T1	Greenwayodendron suaveolens	Annonaceae	13.4
T1	Greenwayodendron suaveolens	Annonaceae	18.5
T1	Greenwayodendron suaveolens	Annonaceae	12.4
T1	Anonidium mannii	Annonaceae	18.8
T1	Greenwayodendron suaveolens	Annonaceae	23.2
T1	Xylopia quintasii	Annonaceae	20.7
T1	Anonidium mannii	Annonaceae	30.2
T1	Greenwayodendron suaveolens	Annonaceae	25.1
T1	Annickia affinis	Annonaceae	17.5
T1	Anonidium mannii	Annonaceae	13.1
T1	Anonidium mannii	Annonaceae	10
T1	Greenwayodendron suaveolens	Annonaceae	39.2
T1	Xylopia quintasii	Annonaceae	17.2
T1	Greenwayodendron suaveolens	Annonaceae	17
T1	Anonidium mannii	Annonaceae	43
T1	Greenwayodendron suaveolens	Annonaceae	14.5
T1	Anonidium mannii	Annonaceae	12.4
T1	Greenwayodendron suaveolens	Annonaceae	11.1
T1	Greenwayodendron suaveolens	Annonaceae	22
T1	Greenwayodendron suaveolens	Annonaceae	10
T1	Greenwayodendron suaveolens	Annonaceae	20.4
T1	Greenwayodendron suaveolens	Annonaceae	33.7
T1	Greenwayodendron suaveolens	Annonaceae	17.8
T1	Greenwayodendron suaveolens	Annonaceae	15
T1	Greenwayodendron suaveolens	Annonaceae	15.9
T1	Anonidium mannii	Annonaceae	55.7
T1	Greenwayodendron suaveolens	Annonaceae	15.6
T1	Xylopia quintasii	Annonaceae	25.1
T1	Anonidium mannii	Annonaceae	13.1
T1	Greenwayodendron suaveolens	Annonaceae	16.9
T1	Greenwayodendron suaveolens	Annonaceae	16.2
T1	Greenwayodendron suaveolens	Annonaceae	10.8
T1	Duguetia staudtii	Annonaceae	13.4
T1	Duguetia staudtii	Annonaceae	12.1
T1	Cleistopholis patens	Annonaceae	27.7
T1	Greenwayodendron suaveolens	Annonaceae	10.2
T1	Anonidium mannii	Annonaceae	21.3
T1	Anonidium mannii	Annonaceae	18.5
T1	Hexalobus crispiflorus	Annonaceae	74.8
T1	Hexalobus crispiflorus	Annonaceae	14.3
T1	Greenwayodendron suaveolens	Annonaceae	47.1
T1	Anonidium mannii	Annonaceae	48.4
T1	Anonidium mannii	Annonaceae	10
T1	Greenwayodendron suaveolens	Annonaceae	10.8
T1	Xylopia sp.	Annonaceae	16.9
T1	Hexalobus crispiflorus	Annonaceae	14
T1	Annickia affinis	Annonaceae	52.2
T1	Greenwayodendron suaveolens	Annonaceae	11.5
T1	Greenwayodendron suaveolens	Annonaceae	12.4
T1	Greenwayodendron suaveolens	Annonaceae	14
T1	Anonidium mannii	Annonaceae	23.6
T1	Greenwayodendron suaveolens	Annonaceae	10
T1	Anonidium mannii	Annonaceae	18.1
T1	Greenwayodendron suaveolens	Annonaceae	21.3
T1	Annickia affinis	Annonaceae	11.1
T1	Anonidium mannii	Annonaceae	15.6
T1	Anonidium mannii	Annonaceae	13.4
T1	Greenwayodendron suaveolens	Annonaceae	16.9
T1	Greenwayodendron suaveolens	Annonaceae	10.5
T1	Xylopia quintasii	Annonaceae	12.1
T1	Hexalobus crispiflorus	Annonaceae	12.4
T2	Greenwayodendron suaveolens	Annonaceae	10
T2	Greenwayodendron suaveolens	Annonaceae	13.4
T2	Xylopia hypolampra	Annonaceae	28.3
T2	Xylopia quintasii	Annonaceae	26.1
T2	Greenwayodendron suaveolens	Annonaceae	14
T2	Greenwayodendron suaveolens	Annonaceae	10
T2	Hexalobus crispiflorus	Annonaceae	13.1
T2	Annickia affinis	Annonaceae	16.6
T2	Anonidium mannii	Annonaceae	15.3
T2	Greenwayodendron suaveolens	Annonaceae	10.5
T2	Anonidium mannii	Annonaceae	20.5
T2	Anonidium mannii	Annonaceae	11.1
T2	Anonidium mannii	Annonaceae	29
T2	Anonidium mannii	Annonaceae	23.6
T2	Anonidium mannii	Annonaceae	11.8
T2	Greenwayodendron suaveolens	Annonaceae	11.8
T2	Greenwayodendron suaveolens	Annonaceae	18.3
T2	Greenwayodendron suaveolens	Annonaceae	29.6
T2	Hexalobus crispiflorus	Annonaceae	11.9
T2	Anonidium mannii	Annonaceae	20.1
T2	Xylopia aethiopica	Annonaceae	33.4
T2	Hexalobus crispiflorus	Annonaceae	22.6
T2	Anonidium mannii	Annonaceae	15
T2	Duguetia staudtii	Annonaceae	13.1
T2	Greenwayodendron suaveolens	Annonaceae	33.4
T2	Anonidium mannii	Annonaceae	31.4
T2	Cleistopholis patens	Annonaceae	18.2
T2	Xylopia sp.	Annonaceae	10.2
T2	Xylopia parviflora	Annonaceae	12
T2	Xylopia parviflora	Annonaceae	49
T2	Xylopia quintasii	Annonaceae	13.4
T2	Greenwayodendron suaveolens	Annonaceae	12.3
T2	Anonidium mannii	Annonaceae	10.3
T2	Greenwayodendron suaveolens	Annonaceae	39.8
T2	Anonidium mannii	Annonaceae	12.9
T2	Annickia affinis	Annonaceae	12.4
T2	Duguetia staudtii	Annonaceae	33.1
T2	Xylopia parviflora	Annonaceae	73.8
T2	Greenwayodendron suaveolens	Annonaceae	11.9
T2	Greenwayodendron suaveolens	Annonaceae	11.3
T2	Anonidium mannii	Annonaceae	12.4
T2	Greenwayodendron suaveolens	Annonaceae	10.8
T2	Greenwayodendron suaveolens	Annonaceae	10.7
T2	Anonidium mannii	Annonaceae	14.3
T2	Xylopia quintasii	Annonaceae	26.2
T2	Cleistopholis patens	Annonaceae	24.5
T2	Cleistopholis patens	Annonaceae	42.3
T2	Xylopia quintasii	Annonaceae	18.4
T2	Greenwayodendron suaveolens	Annonaceae	10.2
T2	Cleistopholis patens	Annonaceae	12.3
T2	Annickia affinis	Annonaceae	47.4
T2	Annickia affinis	Annonaceae	20.1
T2	Annickia affinis	Annonaceae	14.2
T2	Anonidium mannii	Annonaceae	11.5
T2	Annickia affinis	Annonaceae	20.3
T2	Annickia affinis	Annonaceae	38.5
T2	Annickia affinis	Annonaceae	54.7
T2	Cleistopholis patens	Annonaceae	44.2
T2	Anonidium mannii	Annonaceae	18.7
T2	Greenwayodendron suaveolens	Annonaceae	19.7
T2	Xylopia quintasii	Annonaceae	14.9
T2	Annickia affinis	Annonaceae	38.5
T2	Greenwayodendron suaveolens	Annonaceae	11.9
T2	Greenwayodendron suaveolens	Annonaceae	16.4
T2	Greenwayodendron suaveolens	Annonaceae	12.3
T2	Annickia affinis	Annonaceae	46.8
T2	Annickia affinis	Annonaceae	38.5
T2	Greenwayodendron suaveolens	Annonaceae	36.9
T2	Greenwayodendron suaveolens	Annonaceae	12.9
T2	Greenwayodendron suaveolens	Annonaceae	26.6
T2	Duguetia staudtii	Annonaceae	13.4
T2	Greenwayodendron suaveolens	Annonaceae	10.3
T2	Greenwayodendron suaveolens	Annonaceae	16.6
T2	Xylopia aethiopica	Annonaceae	11.7
T2	Xylopia rubescens	Annonaceae	34.4
T2	Xylopia rubescens	Annonaceae	32.1
T2	Xylopia parviflora	Annonaceae	10.8
T2	Greenwayodendron suaveolens	Annonaceae	15.6
T2	Greenwayodendron suaveolens	Annonaceae	16.6
T2	Anonidium mannii	Annonaceae	10.3
T2	Anonidium mannii	Annonaceae	27.1
T2	Greenwayodendron suaveolens	Annonaceae	12.6
T2	Uvariopsis dioica	Annonaceae	14.1
T2	Xylopia rubescens	Annonaceae	11.1
T2	Annickia affinis	Annonaceae	25.3
T2	Uvariopsis dioica	Annonaceae	11.5
T2	Annickia affinis	Annonaceae	14.7
T2	Annickia affinis	Annonaceae	31.8
T2	Monodora tenuifolia	Annonaceae	16.1
T2	Greenwayodendron suaveolens	Annonaceae	10.8
T2	Uvariopsis dioica	Annonaceae	10.5
T2	Anonidium mannii	Annonaceae	13.6
T2	Greenwayodendron suaveolens	Annonaceae	11.1
T2	Xylopia quintasii	Annonaceae	12.3
T2	Annickia affinis	Annonaceae	12.1
T2	Anonidium mannii	Annonaceae	12
T2	Cleistopholis glauca	Annonaceae	29.2
T2	Monodora tenuifolia	Annonaceae	29.1
T2	Annickia affinis	Annonaceae	10.6
T2	Greenwayodendron suaveolens	Annonaceae	42.7
T2	Xylopia rubescens	Annonaceae	27.5
T2	Greenwayodendron suaveolens	Annonaceae	25.1
T2	Greenwayodendron suaveolens	Annonaceae	15.6
T2	Greenwayodendron suaveolens	Annonaceae	10.3
T2	Greenwayodendron suaveolens	Annonaceae	13.1
T2	Monodora tenuifolia	Annonaceae	29.1
T2	Greenwayodendron suaveolens	Annonaceae	17.3
T2	Greenwayodendron suaveolens	Annonaceae	33.1
T2	Annickia affinis	Annonaceae	14
T2	Anonidium mannii	Annonaceae	17.6
T2	Anonidium mannii	Annonaceae	27
T2	Anonidium mannii	Annonaceae	65.6
T3	Annickia affinis	Annonaceae	12.6
T3	Greenwayodendron suaveolens	Annonaceae	15.3
T3	Anonidium mannii	Annonaceae	14.9
T3	Anonidium mannii	Annonaceae	11.1
T3	Anonidium mannii	Annonaceae	10
T3	Greenwayodendron suaveolens	Annonaceae	12.2
T3	Greenwayodendron suaveolens	Annonaceae	24.4
T3	Greenwayodendron suaveolens	Annonaceae	37.9
T3	Greenwayodendron suaveolens	Annonaceae	19.1
T3	Anonidium mannii	Annonaceae	20.7
T3	Greenwayodendron suaveolens	Annonaceae	14.3
T3	Anonidium mannii	Annonaceae	21.5
T3	Greenwayodendron suaveolens	Annonaceae	18.3
T3	Greenwayodendron suaveolens	Annonaceae	11.8
T3	Hexalobus crispiflorus	Annonaceae	44.2
T3	Greenwayodendron suaveolens	Annonaceae	20.7
T3	Anonidium mannii	Annonaceae	18.8
T3	Greenwayodendron suaveolens	Annonaceae	10.3
T3	Greenwayodendron suaveolens	Annonaceae	11
T3	Greenwayodendron suaveolens	Annonaceae	11.9
T3	Greenwayodendron suaveolens	Annonaceae	14.1
T3	Greenwayodendron suaveolens	Annonaceae	14.4
T3	Xylopia quintasii	Annonaceae	14.7
T3	Greenwayodendron suaveolens	Annonaceae	12.8
T3	Xylopia quintasii	Annonaceae	37.2
T3	Greenwayodendron suaveolens	Annonaceae	31.8
T3	Cleistopholis patens	Annonaceae	22
T3	Xylopia quintasii	Annonaceae	16.2
T3	Greenwayodendron suaveolens	Annonaceae	10.8
T3	Greenwayodendron suaveolens	Annonaceae	19.7
T3	Xylopia rubescens	Annonaceae	17.5
T3	Cleistopholis patens	Annonaceae	15.8
T3	Anonidium mannii	Annonaceae	11.8
T3	Anonidium mannii	Annonaceae	21.3
T3	Xylopia quintasii	Annonaceae	20.1
T3	Duguetia staudtii	Annonaceae	57.6
T3	Greenwayodendron suaveolens	Annonaceae	10.5
T3	Greenwayodendron suaveolens	Annonaceae	10
T3	Greenwayodendron suaveolens	Annonaceae	36.6
T3	Annickia affinis	Annonaceae	27.2
T3	Annickia affinis	Annonaceae	33.1
T3	Greenwayodendron suaveolens	Annonaceae	13.1
T3	Greenwayodendron suaveolens	Annonaceae	19.1
T3	Annickia affinis	Annonaceae	28.6
T3	Greenwayodendron suaveolens	Annonaceae	33.1
T3	Greenwayodendron suaveolens	Annonaceae	10.5
T3	Greenwayodendron suaveolens	Annonaceae	15.7
T3	Uvariopsis dioica	Annonaceae	11.1
T3	Anonidium mannii	Annonaceae	13.1
T3	Xylopia parviflora	Annonaceae	83.7
T3	Duguetia staudtii	Annonaceae	12.7
T3	Anonidium mannii	Annonaceae	12.4
T3	Anonidium mannii	Annonaceae	13
T3	Anonidium mannii	Annonaceae	10.8
T3	Annickia affinis	Annonaceae	32.5
T3	Anonidium mannii	Annonaceae	15.3
T3	Annickia affinis	Annonaceae	16.2
T3	Xylopia rubescens	Annonaceae	14.6
T3	Xylopia quintasii	Annonaceae	17.8
T3	Xylopia quintasii	Annonaceae	11.1
T3	Greenwayodendron suaveolens	Annonaceae	14.5
T3	Duguetia staudtii	Annonaceae	12.1
T3	Xylopia quintasii	Annonaceae	10.5
T3	Greenwayodendron suaveolens	Annonaceae	38.4
T3	Greenwayodendron suaveolens	Annonaceae	36.3
T3	Annickia affinis	Annonaceae	13.1
T3	Greenwayodendron suaveolens	Annonaceae	17.7
T3	Greenwayodendron suaveolens	Annonaceae	41.1
T3	Xylopia parviflora	Annonaceae	15.7
T3	Annickia affinis	Annonaceae	26.4
T3	Xylopia aethiopica	Annonaceae	26.7
T3	Xylopia quintasii	Annonaceae	18.8
T3	Xylopia quintasii	Annonaceae	10.8
T3	Anonidium mannii	Annonaceae	15
T3	Xylopia rubescens	Annonaceae	18
T3	Xylopia rubescens	Annonaceae	14.8
T3	Annickia affinis	Annonaceae	10.1
T3	Cleistopholis patens	Annonaceae	32.9
T3	Anonidium mannii	Annonaceae	10.8
T3	Xylopia aethiopica	Annonaceae	14.1
T3	Xylopia aethiopica	Annonaceae	36.4
T3	Greenwayodendron suaveolens	Annonaceae	30.4
T3	Greenwayodendron suaveolens	Annonaceae	16.6
T3	Xylopia quintasii	Annonaceae	16.6
T3	Xylopia quintasii	Annonaceae	12.3
T3	Greenwayodendron suaveolens	Annonaceae	18.8
T3	Anonidium mannii	Annonaceae	25.6
T3	Greenwayodendron suaveolens	Annonaceae	17.5
T3	Uvariopsis dioica	Annonaceae	11.8
T3	Greenwayodendron suaveolens	Annonaceae	54.7
T3	Greenwayodendron suaveolens	Annonaceae	19.7
T3	Greenwayodendron suaveolens	Annonaceae	26.3
T3	Greenwayodendron suaveolens	Annonaceae	33.1
T3	Duguetia staudtii	Annonaceae	13
T3	Greenwayodendron suaveolens	Annonaceae	10.1
T3	Duguetia staudtii	Annonaceae	20.7
T3	Greenwayodendron suaveolens	Annonaceae	11.6
T3	Cleistopholis patens	Annonaceae	31.5
T3	Xylopia quintasii	Annonaceae	12.7
T3	Greenwayodendron suaveolens	Annonaceae	20.4
T3	Anonidium mannii	Annonaceae	27.1
T3	Anonidium mannii	Annonaceae	10
T3	Anonidium mannii	Annonaceae	15.3
T4	Xylopia quintasii	Annonaceae	10.7
T4	Xylopia quintasii	Annonaceae	11.1
T4	Greenwayodendron suaveolens	Annonaceae	12.4
T4	Greenwayodendron suaveolens	Annonaceae	30.2
T4	Duguetia staudtii	Annonaceae	70
T4	Hexalobus crispiflorus	Annonaceae	28.3
T4	Cleistopholis patens	Annonaceae	13.4
T4	Monodora tenuifolia	Annonaceae	24.2
T4	Cleistopholis glauca	Annonaceae	12.1
T4	Uvariopsis dioica	Annonaceae	17.7
T4	Xylopia quintasii	Annonaceae	16.2
T4	Uvariopsis dioica	Annonaceae	11.4
T4	Cleistopholis patens	Annonaceae	13.7
T4	Greenwayodendron suaveolens	Annonaceae	13.8
T4	Uvariopsis dioica	Annonaceae	16
T4	Greenwayodendron suaveolens	Annonaceae	11.9
T4	Uvariopsis dioica	Annonaceae	12.1
T4	Greenwayodendron suaveolens	Annonaceae	13.1
T4	Greenwayodendron suaveolens	Annonaceae	20.1
T4	Greenwayodendron suaveolens	Annonaceae	21.2
T4	Monodora tenuifolia	Annonaceae	14.6
T4	Greenwayodendron suaveolens	Annonaceae	26
T4	Greenwayodendron suaveolens	Annonaceae	25.1
T4	Greenwayodendron suaveolens	Annonaceae	36.6
T4	Greenwayodendron suaveolens	Annonaceae	16.6
T4	Cleistopholis patens	Annonaceae	42.3
T4	Uvariopsis dioica	Annonaceae	11.5
T4	Xylopia rubescens	Annonaceae	14.3
T4	Xylopia rubescens	Annonaceae	11.5
T4	Annickia affinis	Annonaceae	40.4
T4	Xylopia sp.	Annonaceae	17.3
T4	Greenwayodendron suaveolens	Annonaceae	13.8
T4	Greenwayodendron suaveolens	Annonaceae	11.8
T4	Greenwayodendron suaveolens	Annonaceae	14.6
T4	Greenwayodendron suaveolens	Annonaceae	11.8
T4	Annickia affinis	Annonaceae	46.6
T4	Uvariopsis dioica	Annonaceae	16.2
T4	Anonidium mannii	Annonaceae	11
T4	Greenwayodendron suaveolens	Annonaceae	15.8
T4	Greenwayodendron suaveolens	Annonaceae	13.1
T4	Xylopia quintasii	Annonaceae	11.5
T4	Xylopia quintasii	Annonaceae	17.3
T4	Uvariopsis dioica	Annonaceae	12.7
T4	Duguetia staudtii	Annonaceae	60.5
T4	Anonidium mannii	Annonaceae	29.9
T4	Greenwayodendron suaveolens	Annonaceae	12.7
T4	Cleistopholis glauca	Annonaceae	16.1
T4	Annickia affinis	Annonaceae	11.8
T4	Greenwayodendron suaveolens	Annonaceae	34
T4	Greenwayodendron suaveolens	Annonaceae	11.2
T4	Annickia affinis	Annonaceae	20.5
T4	Greenwayodendron suaveolens	Annonaceae	11.9
T4	Xylopia quintasii	Annonaceae	13.1
T4	Greenwayodendron suaveolens	Annonaceae	11.1
T4	Duguetia staudtii	Annonaceae	10.5
T4	Xylopia sp.	Annonaceae	10.1
T4	Greenwayodendron suaveolens	Annonaceae	10.5
T4	Cleistopholis patens	Annonaceae	13.2
T4	Greenwayodendron suaveolens	Annonaceae	49.3
T4	Xylopia quintasii	Annonaceae	10.5
T4	Greenwayodendron suaveolens	Annonaceae	12.6
T4	Anonidium mannii	Annonaceae	17
T4	Uvariopsis dioica	Annonaceae	14.5
T4	Annickia affinis	Annonaceae	21.7
T4	Cleistopholis glauca	Annonaceae	10.6
T4	Cleistopholis glauca	Annonaceae	14.9
T4	Greenwayodendron suaveolens	Annonaceae	16.2
T4	Greenwayodendron suaveolens	Annonaceae	11.5
T4	Greenwayodendron suaveolens	Annonaceae	22
T5	Cleistopholis patens	Annonaceae	21
T5	Cleistopholis patens	Annonaceae	14
T5	Xylopia aethiopica	Annonaceae	27.1
T5	Xylopia parviflora	Annonaceae	35
T5	Anonidium mannii	Annonaceae	14.6
T5	Hexalobus crispiflorus	Annonaceae	73.2
T5	Greenwayodendron suaveolens	Annonaceae	53.2
T5	Anonidium mannii	Annonaceae	20.3
T5	Duguetia staudtii	Annonaceae	47.1
T5	Xylopia aethiopica	Annonaceae	10.5
T5	Duguetia staudtii	Annonaceae	13.1
T5	Greenwayodendron suaveolens	Annonaceae	12.4
T5	Greenwayodendron suaveolens	Annonaceae	23.7
T5	Greenwayodendron suaveolens	Annonaceae	11
T5	Greenwayodendron suaveolens	Annonaceae	23.9
T5	Greenwayodendron suaveolens	Annonaceae	23.9
T5	Anonidium mannii	Annonaceae	22.6
T5	Cleistopholis patens	Annonaceae	20.9
T5	Annickia affinis	Annonaceae	11.6
T5	Anonidium mannii	Annonaceae	16
T5	Anonidium mannii	Annonaceae	31.5
T5	Anonidium mannii	Annonaceae	13.1
T5	Xylopia parviflora	Annonaceae	52.2
T5	Greenwayodendron suaveolens	Annonaceae	19.6
T5	Annickia affinis	Annonaceae	23.2
T5	Annickia affinis	Annonaceae	20.1
T5	Anonidium mannii	Annonaceae	15
T5	Anonidium mannii	Annonaceae	7.4
T5	Anonidium mannii	Annonaceae	11.4
T5	Greenwayodendron suaveolens	Annonaceae	10.6
T5	Greenwayodendron suaveolens	Annonaceae	10.7
T5	Annickia affinis	Annonaceae	17.5
T5	Anonidium mannii	Annonaceae	18
T5	Anonidium mannii	Annonaceae	13.9
T5	Greenwayodendron suaveolens	Annonaceae	14.3
T5	Anonidium mannii	Annonaceae	13.8
T5	Greenwayodendron suaveolens	Annonaceae	18.1
T5	Greenwayodendron suaveolens	Annonaceae	16.2
T5	Anonidium mannii	Annonaceae	19.3
T5	Cleistopholis patens	Annonaceae	32
T5	Xylopia quintasii	Annonaceae	13.6
T5	Xylopia sp.	Annonaceae	35.3
T5	Greenwayodendron suaveolens	Annonaceae	11
T5	Anonidium mannii	Annonaceae	13.1
T5	Greenwayodendron suaveolens	Annonaceae	10.1
T5	Xylopia quintasii	Annonaceae	13.2
T5	Greenwayodendron suaveolens	Annonaceae	11.8
T5	Greenwayodendron suaveolens	Annonaceae	23.6
T5	Greenwayodendron suaveolens	Annonaceae	41.4
T5	Xylopia quintasii	Annonaceae	32.4
T5	Anonidium mannii	Annonaceae	10.7
T5	Annickia affinis	Annonaceae	36.5
T5	Greenwayodendron suaveolens	Annonaceae	11
T5	Greenwayodendron suaveolens	Annonaceae	14
T5	Duguetia staudtii	Annonaceae	17.1
T5	Monodora myristica	Annonaceae	16.6
T5	Annickia affinis	Annonaceae	12.7
T5	Anonidium mannii	Annonaceae	12.8
T5	Greenwayodendron suaveolens	Annonaceae	17.8
T5	Annickia affinis	Annonaceae	16.9
T5	Cleistopholis patens	Annonaceae	26.1
T5	Anonidium mannii	Annonaceae	15
T5	Anonidium mannii	Annonaceae	22.6
T5	Monodora tenuifolia	Annonaceae	10.9
T5	Xylopia quintasii	Annonaceae	14.2
T5	Xylopia quintasii	Annonaceae	10.5
T5	Duguetia staudtii	Annonaceae	41
T5	Xylopia parviflora	Annonaceae	40.6
T5	Anonidium mannii	Annonaceae	18.2
T5	Greenwayodendron suaveolens	Annonaceae	16.6
T5	Anonidium mannii	Annonaceae	20.1
T5	Greenwayodendron suaveolens	Annonaceae	13.5
T5	Anonidium mannii	Annonaceae	12.3
T5	Cleistopholis patens	Annonaceae	11.9
T5	Cleistopholis glauca	Annonaceae	15.8
T6	Cleistopholis patens	Annonaceae	17.5
T6	Cleistopholis patens	Annonaceae	47
T6	Greenwayodendron suaveolens	Annonaceae	21.4
T6	Greenwayodendron suaveolens	Annonaceae	27.6
T6	Xylopia quintasii	Annonaceae	10.8
T6	Greenwayodendron suaveolens	Annonaceae	39.6
T6	Greenwayodendron suaveolens	Annonaceae	19.4
T6	Greenwayodendron suaveolens	Annonaceae	26.5
T6	Annickia affinis	Annonaceae	27.7
T6	Cleistopholis glauca	Annonaceae	25.3
T6	Greenwayodendron suaveolens	Annonaceae	44.5
T6	Greenwayodendron suaveolens	Annonaceae	20.1
T6	Monodora tenuifolia	Annonaceae	14.6
T6	Annickia affinis	Annonaceae	27.2
T6	Greenwayodendron suaveolens	Annonaceae	11.2
T6	Duguetia staudtii	Annonaceae	34.5
T6	Cleistopholis glauca	Annonaceae	11.5
T6	Greenwayodendron suaveolens	Annonaceae	19.2
T6	Anonidium mannii	Annonaceae	15.5
T6	Greenwayodendron suaveolens	Annonaceae	10.9
T6	Greenwayodendron suaveolens	Annonaceae	26.6
T6	Duguetia staudtii	Annonaceae	12.5
T6	Greenwayodendron suaveolens	Annonaceae	25.1
T6	Greenwayodendron suaveolens	Annonaceae	31.5
T6	Greenwayodendron suaveolens	Annonaceae	11.1
T6	Greenwayodendron suaveolens	Annonaceae	11.3
T6	Greenwayodendron suaveolens	Annonaceae	16.4
T6	Xylopia parviflora	Annonaceae	12.3
T6	Anonidium mannii	Annonaceae	10.6
T6	Monodora tenuifolia	Annonaceae	11.9
T6	Annickia affinis	Annonaceae	28.9
T6	Greenwayodendron suaveolens	Annonaceae	13.5
T6	Cleistopholis patens	Annonaceae	22.8
T6	Greenwayodendron suaveolens	Annonaceae	12.5
T6	Annickia affinis	Annonaceae	14.1
T6	Greenwayodendron suaveolens	Annonaceae	23.5
T6	Greenwayodendron suaveolens	Annonaceae	29.3
T6	Greenwayodendron suaveolens	Annonaceae	19.1
T6	Greenwayodendron suaveolens	Annonaceae	26.4
T6	Greenwayodendron suaveolens	Annonaceae	11.5
T6	Cleistopholis patens	Annonaceae	49
T6	Greenwayodendron suaveolens	Annonaceae	28.5
T6	Xylopia quintasii	Annonaceae	44.1
T6	Xylopia rubescens	Annonaceae	16.2
T6	Xylopia rubescens	Annonaceae	39.7
T6	Xylopia rubescens	Annonaceae	38.2
T6	Xylopia rubescens	Annonaceae	47.7
T6	Anonidium mannii	Annonaceae	11.1
T6	Greenwayodendron suaveolens	Annonaceae	13.8
T6	Cleistopholis glauca	Annonaceae	32.7
T6	Duguetia staudtii	Annonaceae	12.4
T6	Greenwayodendron suaveolens	Annonaceae	13.1
T6	Greenwayodendron suaveolens	Annonaceae	15.3
T6	Hexalobus crispiflorus	Annonaceae	34.5
T6	Greenwayodendron suaveolens	Annonaceae	16.8
T6	Anonidium mannii	Annonaceae	23.7
T6	Greenwayodendron suaveolens	Annonaceae	29.3
T6	Greenwayodendron suaveolens	Annonaceae	11.8
T6	Anonidium mannii	Annonaceae	14.3
T6	Annickia affinis	Annonaceae	11.1
T6	Anonidium mannii	Annonaceae	12.4
T6	Greenwayodendron suaveolens	Annonaceae	15.2
T6	Greenwayodendron suaveolens	Annonaceae	16.4
T6	Greenwayodendron suaveolens	Annonaceae	12.2
T6	Anonidium mannii	Annonaceae	16.7
T6	Greenwayodendron suaveolens	Annonaceae	27.2
T6	Greenwayodendron suaveolens	Annonaceae	19.3
T6	Annickia affinis	Annonaceae	33.4
T6	Greenwayodendron suaveolens	Annonaceae	13.8
T6	Anonidium mannii	Annonaceae	13.1
T6	Xylopia aethiopica	Annonaceae	18.2
T6	Xylopia aethiopica	Annonaceae	13.2
T6	Anonidium mannii	Annonaceae	10.5
T6	Greenwayodendron suaveolens	Annonaceae	15.7
T6	Greenwayodendron suaveolens	Annonaceae	11.5
T6	Cleistopholis glauca	Annonaceae	26.6
T6	Anonidium mannii	Annonaceae	10.1
T6	Greenwayodendron suaveolens	Annonaceae	21.6
T6	Annickia affinis	Annonaceae	30.4
T6	Greenwayodendron suaveolens	Annonaceae	26.5
T6	Duguetia staudtii	Annonaceae	14.5
T6	Greenwayodendron suaveolens	Annonaceae	20.7
T6	Greenwayodendron suaveolens	Annonaceae	15.5
T6	Anonidium mannii	Annonaceae	16.3
T6	Anonidium mannii	Annonaceae	11.8
T6	Greenwayodendron suaveolens	Annonaceae	29
T6	Greenwayodendron suaveolens	Annonaceae	23.2
T6	Xylopia aethiopica	Annonaceae	20.8
T6	Anonidium mannii	Annonaceae	15.8
T6	Greenwayodendron suaveolens	Annonaceae	32.3
T6	Cleistopholis glauca	Annonaceae	28.6
T6	Annickia affinis	Annonaceae	14.6
T6	Annickia affinis	Annonaceae	43.9
T6	Annickia affinis	Annonaceae	39.9
T6	Anonidium mannii	Annonaceae	16.7
T6	Xylopia parviflora	Annonaceae	18.7
T6	Xylopia rubescens	Annonaceae	12.1
T7	Greenwayodendron suaveolens	Annonaceae	21.2
T7	Xylopia rubescens	Annonaceae	13.7
T7	Xylopia aethiopica	Annonaceae	16.4
T7	Cleistopholis patens	Annonaceae	23.3
T7	Xylopia aethiopica	Annonaceae	12.3
T7	Greenwayodendron suaveolens	Annonaceae	14
T7	Anonidium mannii	Annonaceae	12.3
T7	Greenwayodendron suaveolens	Annonaceae	34.3
T7	Greenwayodendron suaveolens	Annonaceae	17.7
T7	Greenwayodendron suaveolens	Annonaceae	18.6
T7	Greenwayodendron suaveolens	Annonaceae	10.3
T7	Xylopia quintasii	Annonaceae	12.4
T7	Anonidium mannii	Annonaceae	10.3
T7	Annickia affinis	Annonaceae	48.7
T7	Greenwayodendron suaveolens	Annonaceae	26.5
T7	Greenwayodendron suaveolens	Annonaceae	17.3
T7	Anonidium mannii	Annonaceae	10.2
T7	Xylopia quintasii	Annonaceae	33.3
T7	Annickia affinis	Annonaceae	52.5
T7	Greenwayodendron suaveolens	Annonaceae	20.1
T7	Greenwayodendron suaveolens	Annonaceae	25.5
T7	Annickia affinis	Annonaceae	27.2
T7	Greenwayodendron suaveolens	Annonaceae	21.6
T7	Hexalobus crispiflorus	Annonaceae	73.2
T7	Greenwayodendron suaveolens	Annonaceae	54.1
T7	Greenwayodendron suaveolens	Annonaceae	18.5
T7	Annickia affinis	Annonaceae	28.3
T7	Annickia affinis	Annonaceae	38.8
T7	Anonidium mannii	Annonaceae	15.4
T7	Xylopia quintasii	Annonaceae	19.7
T7	Greenwayodendron suaveolens	Annonaceae	38.5
T7	Xylopia quintasii	Annonaceae	12.8
T7	Greenwayodendron suaveolens	Annonaceae	16.2
T7	Greenwayodendron suaveolens	Annonaceae	14
T7	Duguetia staudtii	Annonaceae	15.3
T7	Annickia affinis	Annonaceae	47.7
T7	Xylopia quintasii	Annonaceae	15.5
T7	Xylopia quintasii	Annonaceae	26.2
T7	Annickia affinis	Annonaceae	17.2
T7	Anonidium mannii	Annonaceae	13.8
T7	Greenwayodendron suaveolens	Annonaceae	28.2
T7	Xylopia quintasii	Annonaceae	15.4
T7	Annickia affinis	Annonaceae	35
T7	Greenwayodendron suaveolens	Annonaceae	35
T7	Anonidium mannii	Annonaceae	11.5
T7	Cleistopholis patens	Annonaceae	16.1
T7	Anonidium mannii	Annonaceae	10.6
T7	Annickia affinis	Annonaceae	12.1
T7	Greenwayodendron suaveolens	Annonaceae	16.9
T7	Greenwayodendron suaveolens	Annonaceae	28.6
T7	Cleistopholis patens	Annonaceae	26.9
T7	Anonidium mannii	Annonaceae	51.2
T7	Anonidium mannii	Annonaceae	26.1
T7	Cleistopholis patens	Annonaceae	13.5
T7	Annickia affinis	Annonaceae	24.2
T7	Annickia affinis	Annonaceae	11.6
T7	Greenwayodendron suaveolens	Annonaceae	20.1
T7	Greenwayodendron suaveolens	Annonaceae	15.9
T7	Greenwayodendron suaveolens	Annonaceae	15.3
T7	Duguetia staudtii	Annonaceae	10.2
T7	Greenwayodendron suaveolens	Annonaceae	20.2
T7	Greenwayodendron suaveolens	Annonaceae	10.9
T7	Greenwayodendron suaveolens	Annonaceae	12.4
T7	Greenwayodendron suaveolens	Annonaceae	18.2
T8	Greenwayodendron suaveolens	Annonaceae	10.8
T8	Greenwayodendron suaveolens	Annonaceae	25.5
T8	Duguetia staudtii	Annonaceae	19.7
T8	Annickia affinis	Annonaceae	13.1
T8	Greenwayodendron suaveolens	Annonaceae	21.3
T8	Greenwayodendron suaveolens	Annonaceae	18.5
T8	Xylopia quintasii	Annonaceae	11.4
T8	Annickia affinis	Annonaceae	16.6
T8	Xylopia quintasii	Annonaceae	12.4
T8	Greenwayodendron suaveolens	Annonaceae	18.5
T8	Greenwayodendron suaveolens	Annonaceae	33.7
T8	Xylopia sp.	Annonaceae	12.7
T8	Greenwayodendron suaveolens	Annonaceae	12.1
T8	Greenwayodendron suaveolens	Annonaceae	12.4
T8	Greenwayodendron suaveolens	Annonaceae	27.1
T8	Greenwayodendron suaveolens	Annonaceae	10.8
T8	Anonidium mannii	Annonaceae	12.1
T8	Anonidium mannii	Annonaceae	13.1
T8	Greenwayodendron suaveolens	Annonaceae	28
T8	Xylopia sp.	Annonaceae	15.9
T8	Greenwayodendron suaveolens	Annonaceae	10.8
T8	Xylopia quintasii	Annonaceae	15
T8	Greenwayodendron suaveolens	Annonaceae	14.3
T8	Anonidium mannii	Annonaceae	13.7
T8	Greenwayodendron suaveolens	Annonaceae	50.3
T8	Greenwayodendron suaveolens	Annonaceae	13.4
T8	Greenwayodendron suaveolens	Annonaceae	16.9
T8	Greenwayodendron suaveolens	Annonaceae	40.4
T8	Xylopia quintasii	Annonaceae	68.1
T8	Greenwayodendron suaveolens	Annonaceae	15.6
T8	Greenwayodendron suaveolens	Annonaceae	16.9
T8	Greenwayodendron suaveolens	Annonaceae	13.7
T8	Greenwayodendron suaveolens	Annonaceae	17.5
T8	Greenwayodendron suaveolens	Annonaceae	12.7
T8	Greenwayodendron suaveolens	Annonaceae	21.6
T8	Annickia affinis	Annonaceae	11.1
T8	Greenwayodendron suaveolens	Annonaceae	24.5
T8	Annickia affinis	Annonaceae	42.7
T8	Greenwayodendron suaveolens	Annonaceae	22.3
T8	Greenwayodendron suaveolens	Annonaceae	10.8
T8	Greenwayodendron suaveolens	Annonaceae	17.5
T8	Cleistopholis patens	Annonaceae	41.1
T8	Greenwayodendron suaveolens	Annonaceae	10.2
T8	Duguetia staudtii	Annonaceae	54.1
T8	Xylopia hypolampra	Annonaceae	10.2
T8	Greenwayodendron suaveolens	Annonaceae	10.5
T8	Greenwayodendron suaveolens	Annonaceae	41.1
T8	Xylopia quintasii	Annonaceae	39.8
T8	Greenwayodendron suaveolens	Annonaceae	45.8
T8	Annickia affinis	Annonaceae	28
T8	Greenwayodendron suaveolens	Annonaceae	10.5
T8	Xylopia quintasii	Annonaceae	51.9
T8	Anonidium mannii	Annonaceae	10.8
T8	Annickia affinis	Annonaceae	38.5
T8	Greenwayodendron suaveolens	Annonaceae	14.3
T8	Greenwayodendron suaveolens	Annonaceae	10.5
T8	Greenwayodendron suaveolens	Annonaceae	11.8
T8	Greenwayodendron suaveolens	Annonaceae	10.8
T8	Annickia affinis	Annonaceae	22.9
T8	Greenwayodendron suaveolens	Annonaceae	12.4
T8	Anonidium mannii	Annonaceae	13.3
T8	Greenwayodendron suaveolens	Annonaceae	18.5
T8	Anonidium mannii	Annonaceae	13.7
T8	Cleistopholis patens	Annonaceae	25.1
T8	Greenwayodendron suaveolens	Annonaceae	33.7
T8	Greenwayodendron suaveolens	Annonaceae	20.7
T8	Anonidium mannii	Annonaceae	11.1
T8	Annickia affinis	Annonaceae	41.4
T8	Annickia affinis	Annonaceae	13.4
T8	Greenwayodendron suaveolens	Annonaceae	25.5
T8	Xylopia quintasii	Annonaceae	14.3
T8	Xylopia quintasii	Annonaceae	51.6
T8	Anonidium mannii	Annonaceae	13.7
T8	Greenwayodendron suaveolens	Annonaceae	39.5
T8	Greenwayodendron suaveolens	Annonaceae	28
T8	Anonidium mannii	Annonaceae	67.2
T8	Greenwayodendron suaveolens	Annonaceae	30.2
T8	Annickia affinis	Annonaceae	13.7
T8	Greenwayodendron suaveolens	Annonaceae	47.1
T8	Annickia affinis	Annonaceae	20.7
T8	Greenwayodendron suaveolens	Annonaceae	19.1
T8	Xylopia quintasii	Annonaceae	18.1
T8	Greenwayodendron suaveolens	Annonaceae	26.7
T8	Anonidium mannii	Annonaceae	12.1
T8	Greenwayodendron suaveolens	Annonaceae	12.7
T8	Anonidium mannii	Annonaceae	10.5
T8	Greenwayodendron suaveolens	Annonaceae	13.4
T8	Greenwayodendron suaveolens	Annonaceae	28
T8	Greenwayodendron suaveolens	Annonaceae	10.8
T8	Annickia affinis	Annonaceae	15
T8	Greenwayodendron suaveolens	Annonaceae	26.6
T8	Annickia affinis	Annonaceae	16.5
T8	Greenwayodendron suaveolens	Annonaceae	17.2
T8	Greenwayodendron suaveolens	Annonaceae	12.4
T8	Xylopia sp.	Annonaceae	11.5
T8	Greenwayodendron suaveolens	Annonaceae	29.6
T8	Annickia affinis	Annonaceae	21.3
T8	Anonidium mannii	Annonaceae	11.5
T8	Anonidium mannii	Annonaceae	10.5
T9	Anonidium mannii	Annonaceae	17.3
T9	Anonidium mannii	Annonaceae	11.1
T9	Greenwayodendron suaveolens	Annonaceae	24.2
T9	Anonidium mannii	Annonaceae	12.7
T9	Anonidium mannii	Annonaceae	52.8
T9	Greenwayodendron suaveolens	Annonaceae	11.5
T9	Cleistopholis patens	Annonaceae	34.1
T9	Anonidium mannii	Annonaceae	32.5
T9	Greenwayodendron suaveolens	Annonaceae	20.4
T9	Annickia affinis	Annonaceae	12.4
T9	Anonidium mannii	Annonaceae	18.6
T9	Anonidium mannii	Annonaceae	13.7
T9	Greenwayodendron suaveolens	Annonaceae	12.5
T9	Xylopia rubescens	Annonaceae	12.3
T9	Greenwayodendron suaveolens	Annonaceae	17.7
T9	Duguetia staudtii	Annonaceae	44.1
T9	Anonidium mannii	Annonaceae	14.3
T9	Greenwayodendron suaveolens	Annonaceae	19.7
T9	Anonidium mannii	Annonaceae	15.1
T9	Anonidium mannii	Annonaceae	14
T9	Greenwayodendron suaveolens	Annonaceae	28.8
T9	Greenwayodendron suaveolens	Annonaceae	20.7
T9	Greenwayodendron suaveolens	Annonaceae	11
T9	Anonidium mannii	Annonaceae	13.4
T9	Annickia affinis	Annonaceae	12.9
T9	Anonidium mannii	Annonaceae	17.5
T9	Anonidium mannii	Annonaceae	14.8
T9	Greenwayodendron suaveolens	Annonaceae	34.7
T9	Greenwayodendron suaveolens	Annonaceae	24.8
T9	Greenwayodendron suaveolens	Annonaceae	17.9
T9	Anonidium mannii	Annonaceae	13.1
T9	Anonidium mannii	Annonaceae	11.6
T9	Greenwayodendron suaveolens	Annonaceae	16.4
T9	Xylopia quintasii	Annonaceae	16.9
T9	Greenwayodendron suaveolens	Annonaceae	30.7
T9	Anonidium mannii	Annonaceae	19
T9	Anonidium mannii	Annonaceae	13.1
T9	Greenwayodendron suaveolens	Annonaceae	23.9
T9	Anonidium mannii	Annonaceae	15.4
T9	Anonidium mannii	Annonaceae	11.2
T9	Duguetia staudtii	Annonaceae	22
T9	Greenwayodendron suaveolens	Annonaceae	34.1
T9	Anonidium mannii	Annonaceae	13.7
T9	Greenwayodendron suaveolens	Annonaceae	18.8
T9	Greenwayodendron suaveolens	Annonaceae	21.3
T9	Greenwayodendron suaveolens	Annonaceae	30.9
T9	Greenwayodendron suaveolens	Annonaceae	36.9
T9	Annickia affinis	Annonaceae	40.7
T9	Xylopia quintasii	Annonaceae	22
T9	Anonidium mannii	Annonaceae	12.9
T9	Greenwayodendron suaveolens	Annonaceae	10.6
T9	Anonidium mannii	Annonaceae	19.2
T9	Anonidium mannii	Annonaceae	10.3
T9	Greenwayodendron suaveolens	Annonaceae	27.1
T9	Annickia affinis	Annonaceae	10.7
T9	Greenwayodendron suaveolens	Annonaceae	31.2
T9	Cleistopholis patens	Annonaceae	17
T9	Anonidium mannii	Annonaceae	13.1
T9	Greenwayodendron suaveolens	Annonaceae	32.5
T9	Greenwayodendron suaveolens	Annonaceae	23.9
T9	Greenwayodendron suaveolens	Annonaceae	11.9
T9	Greenwayodendron suaveolens	Annonaceae	13.7
T9	Greenwayodendron suaveolens	Annonaceae	20.1
T9	Anonidium mannii	Annonaceae	18
T9	Annickia affinis	Annonaceae	43.1
T9	Greenwayodendron suaveolens	Annonaceae	13.4
T9	Xylopia quintasii	Annonaceae	29.8
T9	Greenwayodendron suaveolens	Annonaceae	17.2
T9	Annickia affinis	Annonaceae	18.7
T9	Anonidium mannii	Annonaceae	11.5
T9	Anonidium mannii	Annonaceae	24.4
T1	Tabernaemontana crassa	Apocynaceae	14
T1	Tabernaemontana crassa	Apocynaceae	12.7
T1	Tabernaemontana crassa	Apocynaceae	10.2
T1	Tabernaemontana crassa	Apocynaceae	14
T1	Tabernaemontana crassa	Apocynaceae	14.3
T1	Tabernaemontana crassa	Apocynaceae	12.4
T1	Tabernaemontana crassa	Apocynaceae	15.9
T1	Alstonia boonei	Apocynaceae	22.9
T1	Funtumia elastica	Apocynaceae	31.5
T1	Alstonia boonei	Apocynaceae	18.1
T1	Tabernaemontana crassa	Apocynaceae	18.1
T1	Tabernaemontana crassa	Apocynaceae	12.7
T1	Tabernaemontana crassa	Apocynaceae	12.1
T1	Tabernaemontana crassa	Apocynaceae	13.7
T1	Tabernaemontana crassa	Apocynaceae	18.1
T1	Tabernaemontana crassa	Apocynaceae	19.4
T1	Tabernaemontana crassa	Apocynaceae	13.1
T1	Tabernaemontana crassa	Apocynaceae	19.7
T1	Tabernaemontana crassa	Apocynaceae	16.2
T1	Tabernaemontana crassa	Apocynaceae	11.5
T1	Tabernaemontana crassa	Apocynaceae	13.1
T1	Tabernaemontana crassa	Apocynaceae	11.1
T1	Tabernaemontana crassa	Apocynaceae	12.7
T1	Picralima nitida	Apocynaceae	11.5
T1	Rauvolfia caffra	Apocynaceae	25.5
T1	Tabernaemontana crassa	Apocynaceae	12.4
T1	Tabernaemontana crassa	Apocynaceae	13.7
T1	Tabernaemontana crassa	Apocynaceae	24.5
T1	Picralima nitida	Apocynaceae	10.5
T1	Tabernaemontana crassa	Apocynaceae	16.6
T1	Alstonia boonei	Apocynaceae	38.2
T1	Tabernaemontana crassa	Apocynaceae	15.3
T1	Tabernaemontana crassa	Apocynaceae	15.3
T1	Tabernaemontana crassa	Apocynaceae	10.5
T1	Tabernaemontana crassa	Apocynaceae	10.8
T1	Tabernaemontana crassa	Apocynaceae	17.2
T1	Tabernaemontana crassa	Apocynaceae	22.6
T1	Tabernaemontana crassa	Apocynaceae	12.1
T1	Tabernaemontana crassa	Apocynaceae	17.8
T1	Tabernaemontana crassa	Apocynaceae	13.1
T1	Tabernaemontana crassa	Apocynaceae	10.8
T1	Tabernaemontana crassa	Apocynaceae	12.4
T1	Tabernaemontana crassa	Apocynaceae	10.2
T1	Tabernaemontana crassa	Apocynaceae	14.3
T1	Alstonia boonei	Apocynaceae	22
T1	Tabernaemontana crassa	Apocynaceae	12.1
T1	Tabernaemontana crassa	Apocynaceae	22.3
T1	Tabernaemontana crassa	Apocynaceae	27.4
T1	Alstonia boonei	Apocynaceae	122.2
T1	Tabernaemontana crassa	Apocynaceae	10.8
T1	Tabernaemontana crassa	Apocynaceae	14.3
T1	Tabernaemontana crassa	Apocynaceae	12.4
T1	Tabernaemontana crassa	Apocynaceae	24.2
T1	Tabernaemontana crassa	Apocynaceae	13.4
T1	Tabernaemontana crassa	Apocynaceae	10.5
T1	Funtumia elastica	Apocynaceae	45.2
T1	Tabernaemontana crassa	Apocynaceae	15.6
T1	Tabernaemontana crassa	Apocynaceae	10.8
T1	Tabernaemontana crassa	Apocynaceae	16.9
T1	Tabernaemontana crassa	Apocynaceae	23.6
T1	Tabernaemontana crassa	Apocynaceae	14.3
T1	Tabernaemontana crassa	Apocynaceae	22
T1	Tabernaemontana crassa	Apocynaceae	13.1
T1	Tabernaemontana crassa	Apocynaceae	10.2
T1	Tabernaemontana crassa	Apocynaceae	12.1
T1	Tabernaemontana crassa	Apocynaceae	21.3
T1	Tabernaemontana crassa	Apocynaceae	14.3
T1	Tabernaemontana crassa	Apocynaceae	23.6
T1	Tabernaemontana crassa	Apocynaceae	21.3
T1	Tabernaemontana crassa	Apocynaceae	12.4
T1	Tabernaemontana crassa	Apocynaceae	10.8
T1	Tabernaemontana crassa	Apocynaceae	10.2
T1	Tabernaemontana crassa	Apocynaceae	10.5
T2	Alstonia boonei	Apocynaceae	20.4
T2	Funtumia elastica	Apocynaceae	42.3
T2	Tabernaemontana crassa	Apocynaceae	12.7
T2	Tabernaemontana crassa	Apocynaceae	13.1
T2	Tabernaemontana crassa	Apocynaceae	10
T2	Tabernaemontana crassa	Apocynaceae	16.9
T2	Tabernaemontana crassa	Apocynaceae	11.8
T2	Tabernaemontana crassa	Apocynaceae	16.9
T2	Tabernaemontana crassa	Apocynaceae	22.9
T2	Tabernaemontana crassa	Apocynaceae	28.3
T2	Tabernaemontana crassa	Apocynaceae	12.4
T2	Tabernaemontana crassa	Apocynaceae	11.1
T2	Tabernaemontana crassa	Apocynaceae	11.8
T2	Tabernaemontana crassa	Apocynaceae	18.1
T2	Tabernaemontana crassa	Apocynaceae	13.7
T2	Tabernaemontana crassa	Apocynaceae	20.4
T2	Tabernaemontana crassa	Apocynaceae	10.8
T2	Tabernaemontana citrifolia	Apocynaceae	19.4
T2	Tabernaemontana crassa	Apocynaceae	22.8
T2	Tabernaemontana crassa	Apocynaceae	15.6
T2	Tabernaemontana crassa	Apocynaceae	17
T2	Tabernaemontana crassa	Apocynaceae	10.2
T2	Tabernaemontana crassa	Apocynaceae	15.3
T2	Tabernaemontana crassa	Apocynaceae	13.7
T2	Tabernaemontana crassa	Apocynaceae	15.9
T2	Tabernaemontana crassa	Apocynaceae	12.1
T2	Tabernaemontana crassa	Apocynaceae	13.7
T2	Tabernaemontana crassa	Apocynaceae	11.1
T2	Tabernaemontana crassa	Apocynaceae	18.6
T2	Tabernaemontana crassa	Apocynaceae	13.1
T2	Tabernaemontana crassa	Apocynaceae	12.4
T2	Tabernaemontana crassa	Apocynaceae	15.7
T2	Funtumia elastica	Apocynaceae	20.1
T2	Tabernaemontana crassa	Apocynaceae	12.5
T2	Tabernaemontana crassa	Apocynaceae	11.1
T2	Tabernaemontana crassa	Apocynaceae	13.7
T2	Tabernaemontana crassa	Apocynaceae	14.2
T2	Tabernaemontana crassa	Apocynaceae	12.7
T2	Alstonia boonei	Apocynaceae	84
T2	Tabernaemontana crassa	Apocynaceae	16.1
T2	Tabernaemontana crassa	Apocynaceae	11.5
T2	Alstonia boonei	Apocynaceae	16.5
T2	Tabernaemontana crassa	Apocynaceae	19.6
T2	Tabernaemontana crassa	Apocynaceae	15
T2	Tabernaemontana crassa	Apocynaceae	12.9
T2	Tabernaemontana crassa	Apocynaceae	25.1
T2	Tabernaemontana crassa	Apocynaceae	18.3
T2	Tabernaemontana crassa	Apocynaceae	19.7
T2	Tabernaemontana crassa	Apocynaceae	20.9
T2	Tabernaemontana crassa	Apocynaceae	18.5
T2	Tabernaemontana crassa	Apocynaceae	11.1
T2	Tabernaemontana crassa	Apocynaceae	16.9
T2	Funtumia elastica	Apocynaceae	12.6
T2	Tabernaemontana crassa	Apocynaceae	11.5
T2	Funtumia elastica	Apocynaceae	18.3
T2	Tabernaemontana crassa	Apocynaceae	15.4
T2	Tabernaemontana crassa	Apocynaceae	12.7
T2	Tabernaemontana crassa	Apocynaceae	16
T2	Tabernaemontana crassa	Apocynaceae	14.5
T2	Tabernaemontana crassa	Apocynaceae	27.4
T2	Tabernaemontana crassa	Apocynaceae	13
T2	Tabernaemontana crassa	Apocynaceae	12.7
T2	Tabernaemontana crassa	Apocynaceae	12
T2	Tabernaemontana crassa	Apocynaceae	17
T2	Tabernaemontana crassa	Apocynaceae	17.2
T2	Tabernaemontana crassa	Apocynaceae	27.9
T2	Tabernaemontana crassa	Apocynaceae	28.5
T2	Tabernaemontana crassa	Apocynaceae	23.1
T2	Tabernaemontana crassa	Apocynaceae	26.8
T2	Tabernaemontana crassa	Apocynaceae	14
T2	Tabernaemontana crassa	Apocynaceae	11.2
T2	Tabernaemontana crassa	Apocynaceae	17.3
T2	Tabernaemontana crassa	Apocynaceae	17.8
T2	Tabernaemontana crassa	Apocynaceae	14
T2	Tabernaemontana crassa	Apocynaceae	15.5
T2	Tabernaemontana crassa	Apocynaceae	12.2
T2	Tabernaemontana crassa	Apocynaceae	18.9
T2	Tabernaemontana crassa	Apocynaceae	10.8
T2	Tabernaemontana crassa	Apocynaceae	14.1
T2	Tabernaemontana crassa	Apocynaceae	15.7
T2	Tabernaemontana crassa	Apocynaceae	27.1
T2	Tabernaemontana crassa	Apocynaceae	12.4
T2	Tabernaemontana crassa	Apocynaceae	13.4
T2	Tabernaemontana crassa	Apocynaceae	16.9
T2	Tabernaemontana crassa	Apocynaceae	14.6
T2	Tabernaemontana crassa	Apocynaceae	16.6
T2	Tabernaemontana crassa	Apocynaceae	13.1
T2	Tabernaemontana crassa	Apocynaceae	16.6
T2	Tabernaemontana crassa	Apocynaceae	18.7
T2	Tabernaemontana crassa	Apocynaceae	25.1
T2	Tabernaemontana crassa	Apocynaceae	15.4
T2	Tabernaemontana crassa	Apocynaceae	12.1
T2	Tabernaemontana crassa	Apocynaceae	14
T2	Tabernaemontana crassa	Apocynaceae	11.4
T2	Tabernaemontana crassa	Apocynaceae	11.6
T2	Tabernaemontana crassa	Apocynaceae	12.7
T2	Alstonia boonei	Apocynaceae	15.7
T2	Tabernaemontana crassa	Apocynaceae	15.9
T2	Tabernaemontana crassa	Apocynaceae	10.8
T2	Tabernaemontana crassa	Apocynaceae	17.3
T2	Tabernaemontana crassa	Apocynaceae	10.3
T2	Tabernaemontana crassa	Apocynaceae	17.4
T2	Tabernaemontana crassa	Apocynaceae	19.1
T2	Tabernaemontana crassa	Apocynaceae	15.9
T2	Tabernaemontana crassa	Apocynaceae	12.7
T2	Tabernaemontana crassa	Apocynaceae	10.2
T2	Tabernaemontana crassa	Apocynaceae	22.3
T2	Tabernaemontana crassa	Apocynaceae	18.5
T2	Tabernaemontana crassa	Apocynaceae	14.7
T2	Picralima nitida	Apocynaceae	11.1
T2	Tabernaemontana crassa	Apocynaceae	24.5
T2	Tabernaemontana crassa	Apocynaceae	14.5
T2	Tabernaemontana crassa	Apocynaceae	17.2
T2	Tabernaemontana crassa	Apocynaceae	14.6
T2	Tabernaemontana crassa	Apocynaceae	14.3
T2	Tabernaemontana crassa	Apocynaceae	27.4
T2	Tabernaemontana crassa	Apocynaceae	26.8
T2	Tabernaemontana crassa	Apocynaceae	20.4
T2	Tabernaemontana crassa	Apocynaceae	19.3
T2	Tabernaemontana crassa	Apocynaceae	14.3
T2	Alstonia boonei	Apocynaceae	53.5
T2	Tabernaemontana crassa	Apocynaceae	20.5
T2	Tabernaemontana crassa	Apocynaceae	18.2
T2	Tabernaemontana crassa	Apocynaceae	10.5
T2	Picralima nitida	Apocynaceae	22
T2	Tabernaemontana crassa	Apocynaceae	10.7
T2	Tabernaemontana crassa	Apocynaceae	15.9
T2	Tabernaemontana crassa	Apocynaceae	15.6
T2	Tabernaemontana crassa	Apocynaceae	19.2
T2	Tabernaemontana crassa	Apocynaceae	14.6
T2	Tabernaemontana crassa	Apocynaceae	16.6
T2	Tabernaemontana crassa	Apocynaceae	16.1
T2	Tabernaemontana crassa	Apocynaceae	13.1
T2	Tabernaemontana crassa	Apocynaceae	15.4
T2	Tabernaemontana crassa	Apocynaceae	17.3
T2	Tabernaemontana crassa	Apocynaceae	18
T2	Tabernaemontana crassa	Apocynaceae	11.2
T2	Tabernaemontana crassa	Apocynaceae	14.6
T2	Tabernaemontana crassa	Apocynaceae	24.8
T2	Funtumia elastica	Apocynaceae	12.7
T2	Tabernaemontana crassa	Apocynaceae	10.9
T2	Tabernaemontana crassa	Apocynaceae	15.2
T2	Tabernaemontana crassa	Apocynaceae	22.6
T2	Tabernaemontana crassa	Apocynaceae	17.8
T2	Tabernaemontana crassa	Apocynaceae	16.6
T3	Tabernaemontana crassa	Apocynaceae	10.8
T3	Tabernaemontana crassa	Apocynaceae	10.2
T3	Tabernaemontana crassa	Apocynaceae	12.3
T3	Tabernaemontana crassa	Apocynaceae	17.2
T3	Rauvolfia vomitoria	Apocynaceae	18.3
T3	Funtumia elastica	Apocynaceae	37.9
T3	Tabernaemontana crassa	Apocynaceae	15.9
T3	Tabernaemontana crassa	Apocynaceae	15
T3	Tabernaemontana crassa	Apocynaceae	16
T3	Funtumia elastica	Apocynaceae	40.4
T3	Tabernaemontana crassa	Apocynaceae	18.5
T3	Tabernaemontana crassa	Apocynaceae	14.6
T3	Tabernaemontana crassa	Apocynaceae	11.8
T3	Tabernaemontana crassa	Apocynaceae	23.9
T3	Tabernaemontana crassa	Apocynaceae	15.4
T3	Tabernaemontana crassa	Apocynaceae	12.4
T3	Tabernaemontana crassa	Apocynaceae	11
T3	Tabernaemontana crassa	Apocynaceae	5.7
T3	Tabernaemontana crassa	Apocynaceae	16.2
T3	Tabernaemontana crassa	Apocynaceae	10.5
T3	Tabernaemontana crassa	Apocynaceae	12.3
T3	Tabernaemontana crassa	Apocynaceae	14.3
T3	Tabernaemontana crassa	Apocynaceae	11.1
T3	Tabernaemontana crassa	Apocynaceae	14.3
T3	Tabernaemontana crassa	Apocynaceae	13.5
T3	Tabernaemontana crassa	Apocynaceae	14.6
T3	Tabernaemontana crassa	Apocynaceae	18.5
T3	Tabernaemontana crassa	Apocynaceae	10.2
T3	Tabernaemontana crassa	Apocynaceae	13.8
T3	Tabernaemontana crassa	Apocynaceae	12.4
T3	Tabernaemontana crassa	Apocynaceae	11.5
T3	Tabernaemontana crassa	Apocynaceae	11.5
T3	Tabernaemontana crassa	Apocynaceae	21.7
T3	Tabernaemontana crassa	Apocynaceae	27.9
T3	Alstonia boonei	Apocynaceae	46
T3	Tabernaemontana crassa	Apocynaceae	12.2
T4	Landolphia sp.	Apocynaceae	10.6
T4	Tabernaemontana crassa	Apocynaceae	17.2
T4	Alstonia boonei	Apocynaceae	71
T4	Alstonia boonei	Apocynaceae	35.5
T4	Tabernaemontana crassa	Apocynaceae	12.1
T4	Tabernaemontana crassa	Apocynaceae	15.3
T4	Tabernaemontana crassa	Apocynaceae	14.5
T4	Picralima nitida	Apocynaceae	20.1
T4	Alstonia boonei	Apocynaceae	14.6
T4	Tabernaemontana crassa	Apocynaceae	15
T4	Tabernaemontana crassa	Apocynaceae	18.6
T4	Tabernaemontana crassa	Apocynaceae	13.7
T4	Tabernaemontana crassa	Apocynaceae	14.5
T4	Tabernaemontana crassa	Apocynaceae	27.9
T4	Tabernaemontana crassa	Apocynaceae	11.5
T4	Tabernaemontana crassa	Apocynaceae	21
T4	Tabernaemontana crassa	Apocynaceae	11.8
T4	Tabernaemontana crassa	Apocynaceae	17.3
T4	Picralima nitida	Apocynaceae	12.1
T4	Tabernaemontana crassa	Apocynaceae	13.7
T4	Tabernaemontana crassa	Apocynaceae	17
T4	Tabernaemontana crassa	Apocynaceae	15.4
T4	Tabernaemontana crassa	Apocynaceae	16.1
T4	Tabernaemontana crassa	Apocynaceae	12
T4	Tabernaemontana crassa	Apocynaceae	11.5
T4	Landolphia sp.	Apocynaceae	10.2
T4	Tabernaemontana crassa	Apocynaceae	11.9
T4	Tabernaemontana crassa	Apocynaceae	31.5
T4	Tabernaemontana crassa	Apocynaceae	23.7
T4	Tabernaemontana crassa	Apocynaceae	16.2
T4	Tabernaemontana crassa	Apocynaceae	23.6
T4	Alstonia boonei	Apocynaceae	116.5
T4	Tabernaemontana crassa	Apocynaceae	19.7
T4	Tabernaemontana crassa	Apocynaceae	10.8
T4	Tabernaemontana crassa	Apocynaceae	11.5
T4	Tabernaemontana crassa	Apocynaceae	21.3
T4	Tabernaemontana crassa	Apocynaceae	20.4
T4	Tabernaemontana crassa	Apocynaceae	17.5
T4	Tabernaemontana crassa	Apocynaceae	11.4
T4	Tabernaemontana crassa	Apocynaceae	15.6
T4	Tabernaemontana crassa	Apocynaceae	15
T4	Tabernaemontana crassa	Apocynaceae	10.7
T4	Tabernaemontana crassa	Apocynaceae	18.5
T4	Tabernaemontana crassa	Apocynaceae	12.9
T4	Picralima nitida	Apocynaceae	19.9
T4	Tabernaemontana crassa	Apocynaceae	31.1
T4	Tabernaemontana crassa	Apocynaceae	14.6
T4	Tabernaemontana crassa	Apocynaceae	19.1
T4	Tabernaemontana crassa	Apocynaceae	23.9
T4	Tabernaemontana crassa	Apocynaceae	26.9
T4	Tabernaemontana crassa	Apocynaceae	19.7
T4	Funtumia elastica	Apocynaceae	27.1
T4	Rauvolfia vomitoria	Apocynaceae	25.3
T4	Tabernaemontana crassa	Apocynaceae	10.1
T4	Tabernaemontana crassa	Apocynaceae	11.8
T4	Tabernaemontana crassa	Apocynaceae	19.7
T4	Tabernaemontana crassa	Apocynaceae	26.3
T4	Tabernaemontana crassa	Apocynaceae	10.6
T4	Picralima nitida	Apocynaceae	12.7
T4	Tabernaemontana crassa	Apocynaceae	12.3
T4	Tabernaemontana crassa	Apocynaceae	11.3
T4	Tabernaemontana crassa	Apocynaceae	23.9
T4	Tabernaemontana crassa	Apocynaceae	27.2
T4	Tabernaemontana crassa	Apocynaceae	16.5
T4	Tabernaemontana crassa	Apocynaceae	18.8
T4	Tabernaemontana crassa	Apocynaceae	27.2
T4	Tabernaemontana crassa	Apocynaceae	17.3
T4	Landolphia sp.	Apocynaceae	13.5
T4	Tabernaemontana crassa	Apocynaceae	25.5
T4	Tabernaemontana crassa	Apocynaceae	21.6
T4	Tabernaemontana crassa	Apocynaceae	12.1
T4	Tabernaemontana crassa	Apocynaceae	24
T4	Tabernaemontana crassa	Apocynaceae	19.5
T4	Tabernaemontana crassa	Apocynaceae	17
T4	Tabernaemontana crassa	Apocynaceae	25.3
T4	Tabernaemontana crassa	Apocynaceae	18.6
T4	Tabernaemontana crassa	Apocynaceae	13.3
T4	Tabernaemontana crassa	Apocynaceae	15.7
T4	Tabernaemontana crassa	Apocynaceae	10.2
T5	Tabernaemontana crassa	Apocynaceae	23.8
T5	Tabernaemontana crassa	Apocynaceae	17.3
T5	Tabernaemontana crassa	Apocynaceae	18.5
T5	Tabernaemontana crassa	Apocynaceae	11.3
T5	Tabernaemontana crassa	Apocynaceae	12.4
T5	Funtumia elastica	Apocynaceae	17.9
T5	Tabernaemontana crassa	Apocynaceae	17.8
T5	Tabernaemontana crassa	Apocynaceae	15
T5	Tabernaemontana crassa	Apocynaceae	13.6
T5	Tabernaemontana crassa	Apocynaceae	12.5
T5	Funtumia elastica	Apocynaceae	13.1
T5	Funtumia elastica	Apocynaceae	14.1
T5	Tabernaemontana crassa	Apocynaceae	12.9
T5	Funtumia elastica	Apocynaceae	10.9
T5	Tabernaemontana crassa	Apocynaceae	10
T5	Funtumia elastica	Apocynaceae	11.8
T5	Tabernaemontana crassa	Apocynaceae	16.1
T5	Tabernaemontana crassa	Apocynaceae	10.5
T5	Tabernaemontana crassa	Apocynaceae	15.3
T5	Tabernaemontana crassa	Apocynaceae	15.9
T5	Tabernaemontana crassa	Apocynaceae	13.1
T5	Tabernaemontana crassa	Apocynaceae	16.7
T5	Tabernaemontana crassa	Apocynaceae	12.6
T5	Funtumia elastica	Apocynaceae	13.8
T5	Tabernaemontana crassa	Apocynaceae	14.6
T5	Tabernaemontana crassa	Apocynaceae	22.2
T5	Alstonia boonei	Apocynaceae	47.1
T5	Tabernaemontana crassa	Apocynaceae	14.6
T5	Tabernaemontana crassa	Apocynaceae	13.1
T5	Tabernaemontana crassa	Apocynaceae	13.4
T5	Funtumia elastica	Apocynaceae	19.4
T5	Tabernaemontana crassa	Apocynaceae	13.8
T5	Tabernaemontana crassa	Apocynaceae	16.7
T5	Tabernaemontana crassa	Apocynaceae	16
T5	Tabernaemontana crassa	Apocynaceae	20.5
T5	Alstonia boonei	Apocynaceae	62.1
T5	Tabernaemontana crassa	Apocynaceae	17.2
T5	Tabernaemontana crassa	Apocynaceae	22
T5	Alstonia boonei	Apocynaceae	57.3
T5	Tabernaemontana crassa	Apocynaceae	12.7
T5	Alstonia boonei	Apocynaceae	109.8
T5	Alstonia boonei	Apocynaceae	112
T5	Tabernaemontana crassa	Apocynaceae	12.7
T5	Tabernaemontana crassa	Apocynaceae	13.5
T5	Picralima nitida	Apocynaceae	11.8
T5	Tabernaemontana crassa	Apocynaceae	17.3
T5	Alstonia boonei	Apocynaceae	33.7
T5	Tabernaemontana crassa	Apocynaceae	22.7
T5	Tabernaemontana crassa	Apocynaceae	10.7
T5	Tabernaemontana crassa	Apocynaceae	13.7
T5	Tabernaemontana crassa	Apocynaceae	13.1
T5	Tabernaemontana crassa	Apocynaceae	11.7
T5	Tabernaemontana crassa	Apocynaceae	16.2
T5	Tabernaemontana crassa	Apocynaceae	11.9
T5	Tabernaemontana crassa	Apocynaceae	10.9
T5	Tabernaemontana crassa	Apocynaceae	15.9
T5	Funtumia elastica	Apocynaceae	36.3
T5	Tabernaemontana crassa	Apocynaceae	10.8
T5	Tabernaemontana crassa	Apocynaceae	12.2
T5	Tabernaemontana crassa	Apocynaceae	11.6
T5	Tabernaemontana crassa	Apocynaceae	16
T5	Tabernaemontana crassa	Apocynaceae	12.6
T5	Tabernaemontana crassa	Apocynaceae	13.7
T5	Tabernaemontana crassa	Apocynaceae	13.1
T5	Tabernaemontana crassa	Apocynaceae	11.1
T5	Tabernaemontana crassa	Apocynaceae	13.6
T5	Tabernaemontana crassa	Apocynaceae	11
T5	Tabernaemontana crassa	Apocynaceae	18.5
T5	Tabernaemontana crassa	Apocynaceae	10.8
T5	Tabernaemontana crassa	Apocynaceae	16.4
T5	Tabernaemontana crassa	Apocynaceae	12.4
T5	Tabernaemontana crassa	Apocynaceae	11.5
T5	Tabernaemontana crassa	Apocynaceae	10.9
T5	Tabernaemontana crassa	Apocynaceae	16.7
T5	Tabernaemontana crassa	Apocynaceae	10
T5	Tabernaemontana crassa	Apocynaceae	14.9
T5	Tabernaemontana crassa	Apocynaceae	10.6
T5	Funtumia elastica	Apocynaceae	18.2
T5	Funtumia elastica	Apocynaceae	25.9
T5	Tabernaemontana crassa	Apocynaceae	18.4
T5	Tabernaemontana crassa	Apocynaceae	16.1
T5	Tabernaemontana crassa	Apocynaceae	10.3
T5	Tabernaemontana crassa	Apocynaceae	19.7
T5	Alstonia boonei	Apocynaceae	44.9
T5	Landolphia sp.	Apocynaceae	12.1
T5	Tabernaemontana crassa	Apocynaceae	12.9
T5	Tabernaemontana crassa	Apocynaceae	12.6
T5	Tabernaemontana crassa	Apocynaceae	18.8
T5	Funtumia elastica	Apocynaceae	21.2
T5	Tabernaemontana crassa	Apocynaceae	11
T5	Tabernaemontana crassa	Apocynaceae	18.3
T5	Tabernaemontana crassa	Apocynaceae	14.7
T5	Funtumia elastica	Apocynaceae	23.2
T5	Alstonia boonei	Apocynaceae	108.9
T5	Tabernaemontana crassa	Apocynaceae	15.3
T5	Picralima nitida	Apocynaceae	14.5
T5	Tabernaemontana crassa	Apocynaceae	11.4
T5	Tabernaemontana crassa	Apocynaceae	21.7
T5	Tabernaemontana crassa	Apocynaceae	17.4
T5	Tabernaemontana crassa	Apocynaceae	20.1
T5	Funtumia elastica	Apocynaceae	24.4
T5	Funtumia elastica	Apocynaceae	18.3
T5	Funtumia elastica	Apocynaceae	20.8
T5	Funtumia elastica	Apocynaceae	12.3
T5	Tabernaemontana crassa	Apocynaceae	14.6
T5	Tabernaemontana crassa	Apocynaceae	11.5
T5	Picralima nitida	Apocynaceae	12.8
T5	Tabernaemontana crassa	Apocynaceae	11.8
T5	Tabernaemontana crassa	Apocynaceae	10.8
T5	Tabernaemontana crassa	Apocynaceae	13.2
T5	Tabernaemontana crassa	Apocynaceae	10.3
T5	Tabernaemontana crassa	Apocynaceae	12.3
T5	Tabernaemontana crassa	Apocynaceae	12.7
T5	Tabernaemontana crassa	Apocynaceae	10.3
T5	Tabernaemontana crassa	Apocynaceae	17.3
T5	Tabernaemontana crassa	Apocynaceae	12.9
T5	Tabernaemontana crassa	Apocynaceae	12.7
T5	Tabernaemontana crassa	Apocynaceae	11.1
T5	Tabernaemontana crassa	Apocynaceae	10.3
T5	Tabernaemontana crassa	Apocynaceae	11.6
T5	Alstonia boonei	Apocynaceae	76.4
T5	Landolphia sp.	Apocynaceae	10
T5	Tabernaemontana crassa	Apocynaceae	17.2
T5	Picralima nitida	Apocynaceae	21
T5	Picralima nitida	Apocynaceae	11.5
T5	Tabernaemontana crassa	Apocynaceae	17.6
T5	Tabernaemontana crassa	Apocynaceae	14.5
T5	Tabernaemontana crassa	Apocynaceae	14.3
T5	Alstonia boonei	Apocynaceae	80.2
T5	Tabernaemontana crassa	Apocynaceae	15.2
T5	Tabernaemontana crassa	Apocynaceae	17.6
T5	Tabernaemontana crassa	Apocynaceae	11.8
T5	Tabernaemontana crassa	Apocynaceae	11.7
T6	Funtumia elastica	Apocynaceae	13.6
T6	Funtumia elastica	Apocynaceae	30.9
T6	Tabernaemontana crassa	Apocynaceae	15.3
T6	Tabernaemontana crassa	Apocynaceae	10.6
T6	Tabernaemontana crassa	Apocynaceae	13.4
T6	Funtumia elastica	Apocynaceae	33.5
T6	Tabernaemontana crassa	Apocynaceae	11.6
T6	Funtumia elastica	Apocynaceae	11
T6	Funtumia elastica	Apocynaceae	22.4
T6	Tabernaemontana crassa	Apocynaceae	15.1
T6	Tabernaemontana crassa	Apocynaceae	21.6
T6	Tabernaemontana crassa	Apocynaceae	18.3
T6	Tabernaemontana crassa	Apocynaceae	17.5
T6	Tabernaemontana crassa	Apocynaceae	12.8
T6	Tabernaemontana crassa	Apocynaceae	21.3
T6	Tabernaemontana crassa	Apocynaceae	15.3
T6	Tabernaemontana crassa	Apocynaceae	19.3
T6	Alstonia boonei	Apocynaceae	66.8
T6	Alstonia boonei	Apocynaceae	83.1
T6	Alstonia boonei	Apocynaceae	59.2
T6	Tabernaemontana crassa	Apocynaceae	15.6
T6	Tabernaemontana crassa	Apocynaceae	26.7
T6	Picralima nitida	Apocynaceae	12.9
T6	Strophanthus sp.	Apocynaceae	10.5
T6	Alstonia boonei	Apocynaceae	43.3
T6	Tabernaemontana crassa	Apocynaceae	22.9
T6	Tabernaemontana crassa	Apocynaceae	15
T6	Tabernaemontana crassa	Apocynaceae	18.1
T6	Tabernaemontana crassa	Apocynaceae	19
T6	Tabernaemontana crassa	Apocynaceae	14.9
T6	Funtumia elastica	Apocynaceae	18.3
T6	Tabernaemontana crassa	Apocynaceae	11.3
T6	Tabernaemontana crassa	Apocynaceae	12.4
T6	Tabernaemontana crassa	Apocynaceae	19.7
T6	Tabernaemontana crassa	Apocynaceae	18.2
T6	Tabernaemontana crassa	Apocynaceae	11.8
T6	Tabernaemontana crassa	Apocynaceae	19.3
T6	Tabernaemontana crassa	Apocynaceae	13.1
T6	Tabernaemontana crassa	Apocynaceae	26
T6	Tabernaemontana crassa	Apocynaceae	19.4
T6	Tabernaemontana crassa	Apocynaceae	18.5
T6	Tabernaemontana crassa	Apocynaceae	16.3
T6	Tabernaemontana crassa	Apocynaceae	17
T6	Tabernaemontana crassa	Apocynaceae	14.2
T6	Alstonia boonei	Apocynaceae	66.8
T6	Tabernaemontana crassa	Apocynaceae	12.6
T6	Rauvolfia vomitoria	Apocynaceae	24.8
T6	Tabernaemontana crassa	Apocynaceae	11.4
T6	Tabernaemontana crassa	Apocynaceae	14.3
T6	Tabernaemontana crassa	Apocynaceae	11.6
T6	Tabernaemontana crassa	Apocynaceae	16.1
T6	Tabernaemontana crassa	Apocynaceae	16.4
T6	Tabernaemontana crassa	Apocynaceae	17
T6	Tabernaemontana crassa	Apocynaceae	10.3
T6	Tabernaemontana crassa	Apocynaceae	19
T6	Tabernaemontana crassa	Apocynaceae	14.8
T6	Tabernaemontana crassa	Apocynaceae	18
T6	Funtumia elastica	Apocynaceae	26.6
T6	Tabernaemontana crassa	Apocynaceae	23.2
T6	Tabernaemontana crassa	Apocynaceae	14.3
T6	Tabernaemontana crassa	Apocynaceae	10.8
T6	Tabernaemontana crassa	Apocynaceae	15.4
T6	Tabernaemontana crassa	Apocynaceae	14.8
T6	Tabernaemontana crassa	Apocynaceae	22.8
T6	Funtumia elastica	Apocynaceae	30.2
T6	Tabernaemontana crassa	Apocynaceae	15
T6	Tabernaemontana crassa	Apocynaceae	12.3
T6	Funtumia elastica	Apocynaceae	32.8
T6	Funtumia elastica	Apocynaceae	22.5
T6	Tabernaemontana crassa	Apocynaceae	14.3
T6	Picralima nitida	Apocynaceae	11.1
T6	Tabernaemontana crassa	Apocynaceae	14.1
T6	Tabernaemontana crassa	Apocynaceae	21.3
T6	Tabernaemontana crassa	Apocynaceae	13.1
T6	Tabernaemontana crassa	Apocynaceae	13.8
T6	Tabernaemontana crassa	Apocynaceae	20.8
T6	Funtumia elastica	Apocynaceae	16.9
T6	Funtumia elastica	Apocynaceae	25.1
T6	Tabernaemontana crassa	Apocynaceae	20.6
T6	Tabernaemontana crassa	Apocynaceae	16.2
T6	Tabernaemontana crassa	Apocynaceae	11.6
T6	Funtumia elastica	Apocynaceae	40.2
T6	Tabernaemontana crassa	Apocynaceae	28.9
T6	Tabernaemontana crassa	Apocynaceae	19.8
T6	Tabernaemontana crassa	Apocynaceae	11.3
T6	Tabernaemontana crassa	Apocynaceae	15.4
T6	Tabernaemontana crassa	Apocynaceae	12.4
T6	Tabernaemontana crassa	Apocynaceae	11.4
T6	Tabernaemontana crassa	Apocynaceae	18.8
T6	Tabernaemontana crassa	Apocynaceae	18.6
T6	Tabernaemontana crassa	Apocynaceae	11.8
T6	Funtumia elastica	Apocynaceae	54.7
T6	Funtumia elastica	Apocynaceae	16.6
T6	Funtumia elastica	Apocynaceae	10.8
T6	Funtumia elastica	Apocynaceae	19.3
T6	Tabernaemontana crassa	Apocynaceae	10.2
T6	Rauvolfia vomitoria	Apocynaceae	12.2
T6	Funtumia elastica	Apocynaceae	23.1
T6	Funtumia elastica	Apocynaceae	17.5
T6	Funtumia elastica	Apocynaceae	11.6
T6	Funtumia elastica	Apocynaceae	28.5
T6	Funtumia elastica	Apocynaceae	14.6
T6	Funtumia elastica	Apocynaceae	13
T6	Tabernaemontana crassa	Apocynaceae	14.3
T6	Tabernaemontana crassa	Apocynaceae	15.9
T6	Tabernaemontana crassa	Apocynaceae	12.6
T6	Tabernaemontana crassa	Apocynaceae	11.2
T6	Alstonia boonei	Apocynaceae	57
T6	Funtumia elastica	Apocynaceae	39.2
T6	Funtumia elastica	Apocynaceae	15.4
T6	Tabernaemontana crassa	Apocynaceae	10.8
T6	Tabernaemontana crassa	Apocynaceae	25.5
T6	Tabernaemontana crassa	Apocynaceae	15.3
T6	Tabernaemontana crassa	Apocynaceae	12.5
T6	Tabernaemontana crassa	Apocynaceae	18.8
T6	Tabernaemontana crassa	Apocynaceae	12.7
T6	Tabernaemontana crassa	Apocynaceae	11.5
T6	Tabernaemontana crassa	Apocynaceae	15.4
T6	Tabernaemontana crassa	Apocynaceae	18.2
T6	Tabernaemontana crassa	Apocynaceae	14.3
T6	Tabernaemontana crassa	Apocynaceae	17.7
T6	Tabernaemontana crassa	Apocynaceae	15
T6	Tabernaemontana crassa	Apocynaceae	18.7
T6	Alstonia boonei	Apocynaceae	117.8
T7	Tabernaemontana crassa	Apocynaceae	15.9
T7	Funtumia elastica	Apocynaceae	11.5
T7	Funtumia elastica	Apocynaceae	10.7
T7	Alstonia boonei	Apocynaceae	31.9
T7	Alstonia boonei	Apocynaceae	14.6
T7	Funtumia elastica	Apocynaceae	17.2
T7	Alstonia boonei	Apocynaceae	11.9
T7	Tabernaemontana crassa	Apocynaceae	17.2
T7	Tabernaemontana crassa	Apocynaceae	11.3
T7	Tabernaemontana crassa	Apocynaceae	18.3
T7	Tabernaemontana crassa	Apocynaceae	18.6
T7	Tabernaemontana crassa	Apocynaceae	20.9
T7	Tabernaemontana crassa	Apocynaceae	21.3
T7	Tabernaemontana crassa	Apocynaceae	12.7
T7	Funtumia elastica	Apocynaceae	29.7
T7	Tabernaemontana crassa	Apocynaceae	11.1
T7	Alstonia boonei	Apocynaceae	117.8
T7	Tabernaemontana crassa	Apocynaceae	15.3
T7	Tabernaemontana crassa	Apocynaceae	26.1
T7	Tabernaemontana crassa	Apocynaceae	10.2
T7	Tabernaemontana crassa	Apocynaceae	15.6
T7	Tabernaemontana crassa	Apocynaceae	32.5
T7	Tabernaemontana crassa	Apocynaceae	14.2
T7	Tabernaemontana crassa	Apocynaceae	21.1
T7	Tabernaemontana crassa	Apocynaceae	11
T7	Tabernaemontana crassa	Apocynaceae	13.6
T7	Tabernaemontana crassa	Apocynaceae	11.1
T7	Tabernaemontana crassa	Apocynaceae	14.2
T7	Funtumia elastica	Apocynaceae	22.6
T7	Tabernaemontana crassa	Apocynaceae	13.7
T7	Tabernaemontana crassa	Apocynaceae	13
T7	Tabernaemontana crassa	Apocynaceae	32.5
T7	Tabernaemontana crassa	Apocynaceae	14.5
T7	Tabernaemontana crassa	Apocynaceae	12.3
T7	Tabernaemontana crassa	Apocynaceae	26.1
T7	Tabernaemontana crassa	Apocynaceae	15.6
T7	Tabernaemontana crassa	Apocynaceae	20.1
T7	Tabernaemontana crassa	Apocynaceae	13.3
T7	Tabernaemontana crassa	Apocynaceae	22.4
T7	Tabernaemontana crassa	Apocynaceae	15.1
T7	Tabernaemontana crassa	Apocynaceae	19.1
T7	Tabernaemontana crassa	Apocynaceae	21.9
T7	Funtumia elastica	Apocynaceae	39
T7	Tabernaemontana crassa	Apocynaceae	19.1
T7	Tabernaemontana crassa	Apocynaceae	20.2
T7	Picralima nitida	Apocynaceae	18.1
T7	Tabernaemontana crassa	Apocynaceae	10.7
T7	Tabernaemontana crassa	Apocynaceae	20.1
T7	Tabernaemontana crassa	Apocynaceae	18.1
T7	Tabernaemontana crassa	Apocynaceae	18.9
T7	Tabernaemontana crassa	Apocynaceae	17.9
T7	Tabernaemontana crassa	Apocynaceae	18.3
T7	Tabernaemontana crassa	Apocynaceae	25.4
T7	Tabernaemontana crassa	Apocynaceae	22.6
T7	Tabernaemontana crassa	Apocynaceae	24.7
T7	Alstonia boonei	Apocynaceae	85.9
T7	Tabernaemontana crassa	Apocynaceae	18.9
T7	Tabernaemontana crassa	Apocynaceae	18.6
T7	Tabernaemontana crassa	Apocynaceae	22.6
T7	Tabernaemontana crassa	Apocynaceae	12
T7	Tabernaemontana crassa	Apocynaceae	12.4
T7	Tabernaemontana crassa	Apocynaceae	23.2
T7	Tabernaemontana crassa	Apocynaceae	15.9
T7	Tabernaemontana crassa	Apocynaceae	33.7
T7	Tabernaemontana crassa	Apocynaceae	22.3
T7	Tabernaemontana crassa	Apocynaceae	17.5
T7	Tabernaemontana crassa	Apocynaceae	23.9
T7	Tabernaemontana crassa	Apocynaceae	19.5
T7	Tabernaemontana crassa	Apocynaceae	15.3
T7	Tabernaemontana crassa	Apocynaceae	11.3
T7	Tabernaemontana crassa	Apocynaceae	11.1
T8	Tabernaemontana crassa	Apocynaceae	11.8
T8	Rauvolfia vomitoria	Apocynaceae	14.3
T8	Tabernaemontana crassa	Apocynaceae	20.1
T8	Tabernaemontana crassa	Apocynaceae	11.5
T8	Tabernaemontana crassa	Apocynaceae	14.6
T8	Funtumia elastica	Apocynaceae	24.8
T8	Tabernaemontana crassa	Apocynaceae	20.1
T8	Funtumia elastica	Apocynaceae	28.3
T8	Funtumia elastica	Apocynaceae	40
T8	Tabernaemontana crassa	Apocynaceae	13.2
T8	Tabernaemontana crassa	Apocynaceae	11.5
T8	Tabernaemontana crassa	Apocynaceae	18.1
T8	Tabernaemontana crassa	Apocynaceae	10.8
T8	Tabernaemontana crassa	Apocynaceae	18.1
T8	Funtumia elastica	Apocynaceae	32.8
T8	Tabernaemontana crassa	Apocynaceae	10.5
T8	Tabernaemontana crassa	Apocynaceae	11.3
T8	Rauvolfia caffra	Apocynaceae	24.3
T8	Tabernaemontana crassa	Apocynaceae	11.9
T8	Alstonia boonei	Apocynaceae	106.6
T8	Tabernaemontana crassa	Apocynaceae	14.3
T8	Tabernaemontana crassa	Apocynaceae	18.1
T8	Tabernaemontana crassa	Apocynaceae	10.5
T8	Tabernaemontana crassa	Apocynaceae	15
T8	Tabernaemontana crassa	Apocynaceae	11.8
T8	Tabernaemontana crassa	Apocynaceae	23.6
T8	Tabernaemontana crassa	Apocynaceae	21.6
T8	Tabernaemontana crassa	Apocynaceae	19.4
T8	Tabernaemontana crassa	Apocynaceae	13.7
T8	Tabernaemontana crassa	Apocynaceae	27.7
T8	Tabernaemontana crassa	Apocynaceae	10.2
T8	Tabernaemontana crassa	Apocynaceae	22
T8	Tabernaemontana crassa	Apocynaceae	10.5
T8	Tabernaemontana crassa	Apocynaceae	12.7
T8	Tabernaemontana crassa	Apocynaceae	11.5
T8	Tabernaemontana crassa	Apocynaceae	15
T8	Tabernaemontana crassa	Apocynaceae	10.5
T8	Tabernaemontana crassa	Apocynaceae	10.2
T8	Tabernaemontana crassa	Apocynaceae	15.3
T8	Tabernaemontana crassa	Apocynaceae	32.8
T8	Tabernaemontana crassa	Apocynaceae	16.2
T8	Tabernaemontana crassa	Apocynaceae	17.2
T8	Tabernaemontana crassa	Apocynaceae	22.9
T8	Tabernaemontana crassa	Apocynaceae	12.7
T8	Tabernaemontana crassa	Apocynaceae	20.4
T8	Tabernaemontana crassa	Apocynaceae	13.1
T8	Tabernanthe sp.	Apocynaceae	17.2
T8	Tabernaemontana crassa	Apocynaceae	15.9
T8	Tabernaemontana crassa	Apocynaceae	11.8
T8	Tabernaemontana crassa	Apocynaceae	13.4
T8	Tabernaemontana crassa	Apocynaceae	19.1
T8	Tabernaemontana crassa	Apocynaceae	12.7
T8	Tabernaemontana crassa	Apocynaceae	11.1
T8	Tabernaemontana crassa	Apocynaceae	22.9
T8	Tabernaemontana crassa	Apocynaceae	14.3
T8	Tabernaemontana crassa	Apocynaceae	12.7
T8	Tabernaemontana crassa	Apocynaceae	18.5
T8	Tabernaemontana crassa	Apocynaceae	14
T8	Alstonia boonei	Apocynaceae	63.7
T8	Tabernaemontana crassa	Apocynaceae	18.5
T8	Alstonia boonei	Apocynaceae	132.1
T8	Tabernaemontana crassa	Apocynaceae	21
T8	Tabernaemontana crassa	Apocynaceae	13.4
T8	Tabernaemontana crassa	Apocynaceae	34.7
T8	Tabernaemontana crassa	Apocynaceae	17.8
T8	Tabernaemontana crassa	Apocynaceae	12.7
T8	Tabernaemontana crassa	Apocynaceae	12.7
T8	Tabernaemontana crassa	Apocynaceae	25.5
T8	Tabernaemontana crassa	Apocynaceae	24.8
T8	Tabernaemontana crassa	Apocynaceae	21.3
T8	Picralima nitida	Apocynaceae	10.8
T8	Tabernaemontana crassa	Apocynaceae	15
T8	Alstonia boonei	Apocynaceae	39.8
T8	Funtumia elastica	Apocynaceae	30.6
T8	Tabernaemontana crassa	Apocynaceae	11.5
T8	Tabernaemontana crassa	Apocynaceae	15.9
T8	Tabernaemontana crassa	Apocynaceae	14.3
T8	Tabernaemontana crassa	Apocynaceae	20.4
T8	Alstonia boonei	Apocynaceae	101.9
T8	Alstonia boonei	Apocynaceae	101.9
T8	Tabernaemontana crassa	Apocynaceae	18.1
T8	Tabernaemontana crassa	Apocynaceae	12.7
T9	Tabernaemontana crassa	Apocynaceae	12.7
T9	Tabernaemontana crassa	Apocynaceae	22
T9	Tabernaemontana crassa	Apocynaceae	14.6
T9	Tabernaemontana crassa	Apocynaceae	15.6
T9	Tabernaemontana crassa	Apocynaceae	22.3
T9	Tabernaemontana crassa	Apocynaceae	16.2
T9	Tabernaemontana crassa	Apocynaceae	15.4
T9	Alstonia boonei	Apocynaceae	101.9
T9	Tabernaemontana crassa	Apocynaceae	14
T9	Tabernaemontana crassa	Apocynaceae	23.4
T9	Tabernaemontana crassa	Apocynaceae	18.8
T9	Tabernaemontana crassa	Apocynaceae	11.5
T9	Funtumia elastica	Apocynaceae	23.9
T9	Funtumia africana	Apocynaceae	11.8
T9	Funtumia elastica	Apocynaceae	33.4
T9	Tabernaemontana crassa	Apocynaceae	14.2
T9	Tabernaemontana crassa	Apocynaceae	20.1
T9	Tabernaemontana crassa	Apocynaceae	25.5
T9	Tabernaemontana crassa	Apocynaceae	18.3
T9	Tabernaemontana crassa	Apocynaceae	21.6
T9	Alstonia boonei	Apocynaceae	49.7
T9	Tabernaemontana crassa	Apocynaceae	15.6
T9	Tabernaemontana crassa	Apocynaceae	18.6
T9	Tabernaemontana crassa	Apocynaceae	27.1
T9	Tabernaemontana crassa	Apocynaceae	10.8
T9	Tabernaemontana crassa	Apocynaceae	13.7
T9	Tabernaemontana crassa	Apocynaceae	21.6
T9	Tabernaemontana crassa	Apocynaceae	12.3
T9	Tabernaemontana crassa	Apocynaceae	25.1
T9	Tabernaemontana crassa	Apocynaceae	12.9
T9	Tabernaemontana crassa	Apocynaceae	17.3
T9	Tabernaemontana crassa	Apocynaceae	18.1
T3	Raphia monbuttorum	Arecaceae	1
T3	Raphia monbuttorum	Arecaceae	1
T3	Raphia monbuttorum	Arecaceae	1
T3	Raphia monbuttorum	Arecaceae	1
T3	Raphia monbuttorum	Arecaceae	1
T3	Raphia monbuttorum	Arecaceae	1
T3	Raphia monbuttorum	Arecaceae	1
T3	Raphia monbuttorum	Arecaceae	1
T3	Raphia monbuttorum	Arecaceae	1
T3	Raphia monbuttorum	Arecaceae	1
T4	Raphia monbuttorum	Arecaceae	1
T4	Raphia monbuttorum	Arecaceae	1
T5	Raphia monbuttorum	Arecaceae	1
T5	Raphia monbuttorum	Arecaceae	1
T5	Raphia monbuttorum	Arecaceae	1
T5	Raphia monbuttorum	Arecaceae	1
T5	Raphia monbuttorum	Arecaceae	1
T5	Raphia monbuttorum	Arecaceae	1
T5	Raphia monbuttorum	Arecaceae	1
T5	Raphia monbuttorum	Arecaceae	1
T5	Raphia monbuttorum	Arecaceae	1
T5	Raphia monbuttorum	Arecaceae	1
T5	Raphia monbuttorum	Arecaceae	1
T5	Raphia monbuttorum	Arecaceae	1
T5	Raphia monbuttorum	Arecaceae	1
T5	Raphia monbuttorum	Arecaceae	1
T5	Raphia monbuttorum	Arecaceae	1
T5	Raphia monbuttorum	Arecaceae	1
T5	Raphia monbuttorum	Arecaceae	1
T6	Raphia monbuttorum	Arecaceae	1
T6	Raphia monbuttorum	Arecaceae	1
T6	Raphia monbuttorum	Arecaceae	1
T6	Raphia monbuttorum	Arecaceae	1
T6	Raphia monbuttorum	Arecaceae	1
T6	Raphia monbuttorum	Arecaceae	1
T6	Raphia monbuttorum	Arecaceae	1
T6	Raphia monbuttorum	Arecaceae	1
T6	Raphia monbuttorum	Arecaceae	1
T6	Raphia monbuttorum	Arecaceae	1
T6	Raphia monbuttorum	Arecaceae	1
T6	Raphia monbuttorum	Arecaceae	1
T6	Raphia monbuttorum	Arecaceae	1
T6	Raphia monbuttorum	Arecaceae	1
T6	Raphia monbuttorum	Arecaceae	1
[truncated: 9,547 more rows]
