# Supplementary material for: Tree diversity of the Dja Faunal Reserve, southeastern Cameroon
Source: Biodivers Data J. 2014 Jan 24;(2):e1049. doi: 10.3897/BDJ.2.e1049 (PMC4030213; doi:10.3897/BDJ.2.e1049)
Supplement: Supplementary material 2 — Vegetation distribution across the transects in the Dja Faunal Reserve Cameroon [file biodiversity_data_journal-2-e1049-s002.xls]

## Sheet: vegetation
				Vegetation type 1						Vegetation type 2
Transect number	Vegetation type 1	Vegetation type 2	length (in meters)	FP	FS	FM	FI	A		DPF	SwF	SeF
														Legends
T1	FS	SeF	118		118							118			Vegetation type 1
T1	FS	SeF	20		20							20		FP	Primary forest
T1	FS	SeF	62		62							62		FI	Inundated forest
T1	FS	SeF	100		100							100		FM	Marsh
T1	FP	DPF	150	150						150				A	other disturbed forest
T1	FM	SwF	43			43					43			FS	Secondary forest
T1	FP	DPF	219	219						219					Vegetation type 2
T1	FI	SwF	42				42				42			DPF	Dry primary forest
T1	FM	SwF	26			26					26			SwF	Swamp forest (includes inundated and swap forests)
T1	FM	SwF	75			75					75			SeF	Secondary forest (includes secondary forest and others)
T1	FP	DPF	123	123						123
T1	FP	DPF	293	293						293
T1	FM	SwF	76			76					76
T1	FM	SwF	44			44					44
T1	FP	DPF	670	670						670
T1	FI	SwF	24				24				24
T1	FP	DPF	54	54						54
T1	FM	SwF	97			97					97
T1	FP	DPF	833	833						833
T1	FM	SwF	86			86					86
T1	FP	DPF	471	471						471
T1	FP	DPF	184	184						184
T1	FM	SwF	89			89					89
T1	FP	DPF	118	118						118
T1	FM	SwF	60			60					60
T1	FP	DPF	694	694						694
T1	FM	SwF	91			91					91
T1	FP	DPF	138	138						138
		Total	5000	3947	300	687	66	0		3947	753	300
		% of transect		78.94	6	13.74	1.32	0		78.94	15.06	6
T2	FP	DPF	268	268						268
T2	FM	SwF	32			32					32
T2	FP	DPF	496	496						496
T2	FM	SwF	124			124					124
T2	FP	DPF	304	304						304
T2	A	SeF	258					258				258
T2	FP	DPF	108	108						108
T2	FM	SwF	44			44					44
T2	FP	DPF	100	100						100
T2	FM	SwF	126			126					126
T2	FP	DPF	434	434						434
T2	FP	DPF	106	106						106
T2	FS	SeF	600		600							600
T2	FP	DPF	200	200						200
T2	FS	SeF	400		400							400
T2	FP	DPF	90	90						90
T2	FM	SwF	224			224					224
T2	FP	DPF	186	186						186
T2	FP	DPF	345	345						345
T2	FP	DPF	132	132						132
T2	FM	SwF	61			61					61
T2	FP	DPF	362	362						362
		Total	5000	3131	1000	611	0	258		3131	611	1258
		% of transect		62.62	20	12.22	0	5.16		62.62	12.22	25.16
T3	FP	DPF	405	405						405
T3	FM	SwF	20			20					20
T3	FP	DPF	79	79						79
T3	FM	SwF	16			16					16
T3	FP	DPF	470	470						470
T3	FM	SwF	266			266					266
T3	FP	DPF	1094	1094						1094
T3	FM	SwF	155			155					155
T3	FP	DPF	370	370						370
T3	FM	SwF	272			272					272
T3	FP	DPF	605	605						605
T3	FM	SwF	19			19					19
T3	FP	DPF	597	597						597
T3	FM	SwF	42			42					42
T3	FP	DPF	590	590						590
		Total	5000	4210	0	790	0	0		4210	790	0
		% of transect		84.2	0	15.8	0	0		84.2	15.8	0
T4	FP	DPF	425	425						425
T4	FM	SwF	61			61					61
T4	FP	DPF	932	932						932
T4	FP	DPF	73	73						73
T4	FP	DPF	609	609						609
T4	FP	DPF	120	120						120
T4	FP	DPF	225	225						225
T4	FP	DPF	225	225						225
T4	FP	DPF	190	190						190
T4	FM	SwF	140			140					140
T4	FP	DPF	400	400						400
T4	FI	SwF	260				260				260
T4	FM	SwF	75			75					75
T4	FI	SwF	75				75				75
T4	FP	DPF	190	190						190
T4	FP	DPF	129	129						129
T4	FP	DPF	656	656						656
T4	FM	SwF	75			75					75
T4	FP	DPF	140	140						140
		Total	5000	4314	0	351	335	0		4314	686	0
		% of transect		86.28	0	7.02	6.7	0		86.28	13.72	0
T5	FP	DPF	35	35						35
T5	FS	SeF	403		403							403
T5	FP	DPF	155	155						155
T5	FM	SwF	57			57					57
T5	FP	DPF	540	540						540
T5	FM	SwF	12			12					12
T5	FP	DPF	943	943						943
T5	FM	SwF	90			90					90
T5	FI	SwF	19				19				19
T5	FP	DPF	700	700						700
T5	FI	SwF	70				70				70
T5	FP	DPF	437	437						437
T5	FM	SwF	51			51					51
T5	FP	DPF	703	703						703
T5	FM	SwF	114			114					114
T5	FP	DPF	463	463						463
T5	FM	SwF	17			17					17
T5	FP	DPF	191	191						191
		Total	5000	4167	403	341	89	0		4167	430	403
		% of transect		83.34	8.06	6.82	1.78	0		83.34	8.6	8.06
T6	FM	SwF	50			50					50
T6	FP	DPF	226	226						226
T6	FP	DPF	494	494						494
T6	FP	DPF	188	188						188
T6	FI	SwF	20				20				20
T6	FM	SwF	22			22					22
T6	FI	SwF	54				54				54
T6	FP	DPF	196	196						196
T6	A	SeF	500					500				500
T6	FP	DPF	242	242						242
T6	FM	SwF	180			180					180
T6	FM	SwF	155			155					155
T6	FM	SwF	23			23					23
T6	FM	SwF	50			50					50
T6	FM	SwF	31			31					31
T6	A	SeF	98					98				98
T6	FP	DPF	71	71						71
T6	A	SeF	40					40				40
T6	FP	DPF	76	76						76
T6	A	SeF	70					70				70
T6	FP	DPF	619	619						619
T6	FM	SwF	25			25					25
T6	A	SeF	152					152				152
T6	FP	DPF	372	372						372
T6	FM	SwF	36			36					36
T6	FM	SwF	85			85					85
T6	FP	DPF	346	346						346
T6	FM	SwF	36			36					36
T6	FM	SwF	49			49					49
T6	FP	DPF	494	494						494
		Total	5000	3324	0	742	74	860		3324	816	860
		% of transect		66.48	0	14.84	1.48	17.2		66.48	16.32	17.2
T7	A	SeF	800					800				800
T7	FS	SeF	200		200							200
T7	FP	DPF	800	800						800
T7	FP	DPF	150	150						150
T7	FP	DPF	1050	1050						1050
T7	FM	SwF	150			150					150
T7	FS	SeF	750		750							750
T7	FP	DPF	400	400						400
T7	FP	DPF	250	250						250
T7	FP	DPF	300	300						300
T7	FM	SwF	50			50					50
T7	FP	DPF	100	100						100
		Total	5000	3050	950	200	0	800		3050	200	1750
		% of transect		61	19	4	0	16		61	4	35
T8	FP	DPF	350	350						350
T8	FS	SeF	600		600							600
T8	A	SwF	150					150			150
T8	FI	SwF	400				400				400
T8	FP	DPF	1700	1700						1700
T8	FI	SwF	300				300				300
T8	FM	SwF	100			100					100
T8	FP	DPF	250	250						250
T8	FP	DPF	750	750						750
T8	FI	SwF	50				50				50
T8	FP	DPF	350	350						350
		Total	5000	3400	600	100	750	150		3400	1000	600
		% of transect		68	12	2	15	3		68	20	12
T9	FS	SeF	1900		1900							1900
T9	FP	DPF	315	315						315
T9	FM	SwF	35			35					35
T9	FP	DPF	190	190						190
T9	FM	SwF	90			90					90
T9	FP	DPF	270	270						270
T9	FM	SwF	80			80					80
T9	FP	DPF	395	395						395
T9	FM	SwF	75			75					75
T9	FP	DPF	250	250						250
T9	FP	DPF	247	247						247
T9	FM	SwF	103			103					103
T9	FP	DPF	200	200						200
T9	FI	SwF	100				100				100
T9	FP	DPF	150	150						150
T9	FP	DPF	500	500						500
T9	FI	SwF	40				40				40
T9	FP	DPF	60	60						60
		Total	5000	2577	1900	383	140	0		2577	523	1900
		% of transect		51.54	38	7.66	2.8	0		51.54	10.46	38
		Total over all transects	50000	32120	5153	4205	1454	2068		32120	5809	7071
				0.6424	0.10306	0.0841	0.02908	0.04136		0.6424	0.11618	0.14142
