# Supplementary material for: Tree diversity of the Dja Faunal Reserve, southeastern Cameroon
Source: Biodivers Data J. 2014 Jan 24;(2):e1049. doi: 10.3897/BDJ.2.e1049 (PMC4030213; doi:10.3897/BDJ.2.e1049)
Supplement: Supplementary material 3 — Individual abundances per family [file biodiversity_data_journal-2-e1049-s003.xls]

## Sheet: Feuil1
Family	Number of individuals
Fabaceae	1203
Phyllanthaceae	1011
Olacaceae	830
Annonaceae	826
Apocynaceae	775
Euphorbiaceae	760
Meliaceae	605
Rubiaceae	446
Burseraceae	436
Malvaceae	418
Irvingiaceae	385
Lecythidaceae	382
Anacardiaceae	339
Putranjivaceae	320
Myristicaceae	308
Sapindaceae	270
Cannabaceae	215
Violaceae	195
Moraceae	176
Sapotaceae	165
Clusiaceae	162
Urticaceae	161
Salicaceae	143
Ebenaceae	104
Arecaceae	93
Pandaceae	86
Lepidobotryaceae	84
Chrysobalanaceae	79
Combretaceae	55
Rhamnaceae	55
Rutaceae	48
Myrtaceae	48
Calophyllaceae	39
Lauraceae	37
Centroplacaceae	34
Bignoniaceae	31
Vochysiaceae	31
Celastraceae	30
Simaroubaceae	28
Ochnaceae	26
Verbenaceae	25
Passifloraceae	19
Dilleniaceae	10
Anisophylleaceae	10
Boraginaceae	9
Ixonanthaceae	8
Achariaceae	8
Agavaceae	5
Loganiaceae	3
Hypericaceae	3
Melastomataceae	3
Myrsinaceae	1
Dichapetalaceae	1
Oleaceae	1
Asteraceae	1
(vide)
Total général	11546
